# Supplementary material
Source: publisher figshare collection journal article supplement (https://tandf.figshare.com/articles/dataset/_/19195805)
Supplement: Supplementary file 1 [file 1]

## Sheet: S1-B
Table S1-B: Information considering all articles included in this review.
Biomarker	PMID	Year	Author	Ethnicity	Region	Therapeutic Area
ABCB1	23996099	2013	Coelho et al	Black	Northeast	Infections and Infectious Diseases
ABCB1	23996099	2013	Coelho et al	White	Northeast	Infections and Infectious Diseases
ABCB1	24528196	2014	Cusinato et al.	Not informed	Southwest	Nephrology
ABCB1	25312789	2014	de Oliveira Almeida et al	not informed	Southwest	Cardiology and Vascular Diseases
ABCB1	22641402	2012	Oliveira et al	Not informed	Southwest	Oncology
ABCB1	22641402	2012	Oliveira et al	Not informed	Southwest	Controls
ABCB1	22280542	2012	Oliveira Rodrigues et al.	Not informed	Southwest	Oncology
ABCB1	23684483	2013	Palodetto et al	Not informed	Southwest	Oncology
ABCB1	21806386	2011	Santoro et al.	White	Southwest	Nephrology
ABCB1	21806386	2011	Santoro et al	Mixed	Southwest	Nephrology
ABCB1	21806386	2011	Santoro et al	Black	Southwest	Nephrology
ABCB1	21806386	2011	Santoro et al	Yellow	Southwest	Nephrology
ABCB1	24660038	2014	Vivona et al.	Not informed	Southwest	Oncology
ABCB1	22134106	2012	Vivona et al	White	Southwest	Oncology
ABCB1	22134106	2012	Vivona et al	Mixed	Southwest	Oncology
ABCB1	22134106	2012	Vivona et al	Black	Southwest	Oncology
ABCB1	22134106	2012	Vivona et al	Yellow	Southwest	Oncology
ABCB1	22134106	2012	Vivona et al	Not informed	Southwest	Controls
ABCB1	29868865	2018	Almeida et al.	Admixed	Southwest	Infections and Infectious Diseases
ABCB1	31123858	2019	Castro et al.	Not informed	Southwest	Oncology
ABCB1	28524801	2017	Cilião et al.	White	South	Nephrology
ABCB1	28524801	2017	Cilião et al.	Black	South	Nephrology
ABCB1	28524801	2017	Cilião et al.	Yellow	South	Nephrology
ABCB1	30392849	2018	Coelho et al.	Admixed	Northeast	Infections and Infectious Diseases
ABCB1	31124417	2019	Costa et al.	Not informed	Diverse	Infections and Infectious Diseases
ABCB1	26287941	2015	Rocha et al.	White	South	Infections and Infectious Diseases
ABCB1	26287941	2015	Rocha et al.	Black	South	Infections and Infectious Diseases
ABCB1	28670140	2017	Delou et al.	Diverse	Southwest	Oncology
ABCB1	31849280	2020	Gengivir et al.	White	Southwest	Nephrology
ABCB1	31849280	2020	Gengivir et al.	Black	Southwest	Nephrology
ABCB1	31849280	2020	Gengivir et al.	Mixed	Southwest	Nephrology
ABCB1	31849280	2020	Gengivir et al.	Not informed	Southwest	Nephrology
ABCB1	27434656	2016	Gengivir et al.	White	Southwest	Nephrology
ABCB1	27434656	2016	Gengivir et al.	Mixed	Southwest	Nephrology
ABCB1	27434656	2016	Gengivir et al.	Black	Southwest	Nephrology
ABCB1	27434656	2016	Gengivir et al.	Not informed	Southwest	Nephrology
ABCB1	28572401	2017	Pontual et al.	Diverse	Southwest	Infections and Infectious Diseases
ABCB1	28052106	2017	Silva-Alves et al.	Not informed	Southwest	Psychiatry and Psychology
ABCB1	28975866	2017	Sortica et al.	Admixed	North	Infections and Infectious Diseases
ABCB1	30051215	2018	Tavares et al. (1)	White	Southwest	Cardiology and Vascular Diseases
ABCB1	30051215	2018	Tavares et al. (1)	Mixed	Southwest	Cardiology and Vascular Diseases
ABCB1	30051215	2018	Tavares et al. (1)	Black	Southwest	Cardiology and Vascular Diseases
ABCB1	31539757	2019	De Marchi et al.	Not informed	Southwest	Oncology
ABCB1	31056713	2019	Paula et al.	Not informed	Southwest	Oncology
ABCB1	25728017	2015	Barcelos et al	River dwellers	North	Healthy volunteers
ABCB1	22136368	2012	Sortica et al	White	North	Healthy volunteers
ABCB1	22136368	2012	Sortica et al	Mixed	North	Healthy volunteers
ABCB1	22136368	2012	Sortica et al	Black	North	Healthy volunteers
ABCB1	22136368	2012	Sortica et al	White	Northeast	Healthy volunteers
ABCB1	22136368	2012	Sortica et al	Mixed	Northeast	Healthy volunteers
ABCB1	22136368	2012	Sortica et al	Black	Northeast	Healthy volunteers
ABCB1	22136368	2012	Sortica et al	White	Southwest	Healthy volunteers
ABCB1	22136368	2012	Sortica et al	Mixed	Southwest	Healthy volunteers
ABCB1	22136368	2012	Sortica et al	Black	Southwest	Healthy volunteers
ABCB1	22136368	2012	Sortica et al	White	South	Healthy volunteers
ABCB1	22136368	2012	Sortica et al	Mixed	South	Healthy volunteers
ABCB1	22136368	2012	Sortica et al	Black	South	Healthy volunteers
ABCB1	12031911	2002	Calado et al	Diverse	Not informed	Healthy volunteers
ABCB1	21247447	2011	Santos et al	Native American -	Southwest	Healthy volunteers
ABCB1	21247447	2011	Santos et al	White	Diverse	Healthy volunteers
ABCB1	21247447	2011	Santos et al	Mixed	Diverse	Healthy volunteers
ABCB1	21247447	2011	Santos et al	Black	Diverse	Healthy volunteers
ABCB1	16138223	2005	Rodrigues et al.	White	Southwest	Healthy volunteers
ABCB1	16321621	2005	Fiegenbaum et al	White	South	Healthy volunteers
ABCB1	29713005	2018	Rodrigues-Soares et al.	Diverse	South	Healthy volunteers
ABCB1	29713005	2018	Rodrigues-Soares et al.	Diverse	Southwest	Healthy volunteers
ABCB1	29713005	2018	Rodrigues-Soares et al.	Diverse	Northeast	Healthy volunteers
ABCC1	23996099	2013	Coelho et al	Black	Northeast	Infections and Infectious Diseases
ABCC1	23996099	2013	Coelho et al	White	Northeast	Infections and Infectious Diseases
ABCC1	30392849	2018	Coelho et al.	Admixed	Northeast	Infections and Infectious Diseases
ABCC1	31539757	2019	De Marchi et al.	Not informed	Southwest	Oncology
ABCC1	30269037	2018	Carvalho et al.	Admixed	North	Oncology
ABCC2	28524801	2017	Cilião et al.	White	South	Nephrology
ABCC2	28524801	2017	Cilião et al.	Black	South	Nephrology
ABCC2	28524801	2017	Cilião et al.	Yellow	South	Nephrology
ABCC2	26287941	2015	Rocha et al.	White	South	Infections and Infectious Diseases
ABCC2	26287941	2015	Rocha et al.	Black	South	Infections and Infectious Diseases
ABCC2	31539757	2019	De Marchi et al.	Not informed	Southwest	Oncology
ABCC2	31849280	2020	Gengivir et al.	White	Southwest	Nephrology
ABCC2	31849280	2020	Gengivir et al.	Black	Southwest	Nephrology
ABCC2	31849280	2020	Gengivir et al.	Mixed	Southwest	Nephrology
ABCC2	31849280	2020	Gengivir et al.	Not informed	Southwest	Nephrology
ABCC2	28316087	2017	Gengivir et al.	Not informed	Southwest	Nephrology
ABCC2	28052106	2017	Silva-Alves et al.	Not informed	Southwest	Psychiatry and Psychology
ABCC4	26287941	2015	da Rocha et al.	White	South	Infections and Infectious Diseases
ABCC4	26287941	2015	da Rocha et al.	Black	South	Infections and Infectious Diseases
ABCC4	28975866	2017	Sortica et al.	Admixed	North	Infections and Infectious Diseases
ABCC4	31539757	2019	De Marchi et al.	Not informed	Southwest	Oncology
ABCG2	28524801	2017	Cilião et al.	White	South	Nephrology
ABCG2	28524801	2017	Cilião et al.	Black	South	Nephrology
ABCG2	28524801	2017	Cilião et al.	Yellow	South	Nephrology
ABCG2	24469953	2014	de Lima et al.	Not informed	Southwest	Controls
ABCG2	24469953	2014	de Lima et al.	Not informed	Southwest	Oncology
ABCG2	28316087	2017	Gengivir et al.	Not informed	Southwest	Nephrology
ABCG2	31849280	2020	Gengivir et al.	White	Southwest	Nephrology
ABCG2	31849280	2020	Gengivir et al.	Black	Southwest	Nephrology
ABCG2	31849280	2020	Gengivir et al.	Mixed	Southwest	Nephrology
ABCG2	31849280	2020	Gengivir et al.	Not informed	Southwest	Nephrology
ABCG2	30659932	2019	Malfará et al.	Not informed	Southwest	Cardiology and Vascular Diseases
ABCG2	30392849	2018	Coelho et al.	Admixed	Northeast	Infections and Infectious Diseases
ABCG2	31539757	2019	De Marchi et al.	Not informed	Southwest	Oncology
ADORA2A	25872644	2015	Rieck et al	White	South	Psychiatry and Psychology
ADORA2A	25872644	2015	Rieck et al	not informed	South	Psychiatry and Psychology
ADORA2A	30946941	2019	Fraporti et al.	White	South	Psychiatry and Psychology
ADORA2A	30946941	2019	Fraporti et al.	not informed	South	Psychiatry and Psychology
ADORA2A	30511252	2019	Oliveira et al.	Diverse	South	Psychiatry and Psychology
ADORA2A	32294749	2020	Santos-Lobato et al.	Not informed	Southwest	Psychiatry and Psychology
ADORA2A	28215251	2016	Nunes et al.	Not informed	Southwest	Healthy volunteers
ADRB1	18773997	2008	Biolo et al	white	South	Cardiology and Vascular Diseases
ADRB1	18773997	2008	Biolo et al	not informed	South	Cardiology and Vascular Diseases
ADRB1	18773997	2008	Biolo et al	white	South	Controls
ADRB1	18773997	2008	Biolo et al	not informed	South	Controls
ADRB1	20185488	2010	Chemello et al	White	South	Cardiology and Vascular Diseases
ADRB1	20185488	2010	Chemello et al	not informed	South	Cardiology and Vascular Diseases
ADRB1	23064657	2013	Pereira et al	black	Southwest	Cardiology and Vascular Diseases
ADRB1	23064657	2013	Pereira et al	Not informed	Southwest	Cardiology and Vascular Diseases
ADRB1	23064657	2013	Pereira et al	not informed	Southwest	Controls
ADRB1	25815601	2015	Santos	Black	Southwest	Healthy volunteers
ADRB1	25815601	2015	Santos	Not informed	Southwest	Healthy volunteers
ADRB2	24499171	2014	de Paiva et al	not informed	Southwest	Immunology
ADRB2	24499171	2014	de Paiva et al	not informed	Southwest	Controls
ADRB2	20515505	2010	Gowdak et al	not informed	Southwest	Cardiology and Vascular Diseases
ADRB2	20515505	2010	Gowdak et al	not informed	Southwest	Controls
ADRB2	22950544	2012	Marson et al	White	Southwest	Several
ADRB2	22950544	2012	Marson et al	not informed	Southwest	Several
ADRB2	23064657	2013	Pereira et al	black	Southwest	Cardiology and Vascular Diseases
ADRB2	23064657	2013	Pereira et al	Not informed	Southwest	Cardiology and Vascular Diseases
ADRB2	23064657	2013	Pereira et al	not informed	Southwest	Controls
ADRB2	31264537	2019	Bonato et al.	Not informed	Southwest	Rheumatology
ADRB2	31285095	2019	Tesch et al.	Not informed	Southwest	Controls
ADRB2	28235084	2017	Ferreira-Santos et al.	Not informed	Southwest	Cardiology and Vascular Diseases
ADRB2	21233811	2011	Angeli et al	Black	Southwest	Healthy volunteers
ADRB2	21233811	2011	Angeli et al	White	South	Healthy volunteers
ADRB2	16493638	2006	Mattevi et al	White	South	Healthy volunteers
ADRB2	12900437	2003	Pereira et al	White	Southwest	Healthy volunteers
ADRB2	12900437	2003	Pereira et al	Mixed	Southwest	Healthy volunteers
ADRB2	12900437	2003	Pereira et al	Black	Southwest	Healthy volunteers
ADRB2	12900437	2003	Pereira et al	Not informed	Southwest	Healthy volunteers
ADRB2	24688286	2014	Saliba et al	Not informed	South	Healthy volunteers
ADRB2	15703163	2005	Trombetta	Diverse	Southwest	Healthy volunteers
ADRB2	22881137	2012	Daher et al	not informed	Center west	Healthy volunteers
ADRB2	31915906	2020	Rodrigues et al.	Not informed	Southwest	Healthy volunteers
ADRB2	29713005	2018	Rodrigues-Soares et al.	Diverse	South	Healthy volunteers
ADRB2	29713005	2018	Rodrigues-Soares et al.	Diverse	Southwest	Healthy volunteers
ADRB2	29713005	2018	Rodrigues-Soares et al.	Diverse	Northeast	Healthy volunteers
ALK	17219009	2007	Assis et al	not informed	Southwest	Several
ALK	17219009	2007	Assis et al	not informed	Southwest	Controls
ANKK1	25684044	2015	Vasconcelos et al	White	Northeast	Psychiatry and Psychology
ANKK1	25684044	2015	Vasconcelos et al	White	Northeast	Controls
ANKK1	23171335	2012	Rieck et al	Not informed	South	Psychiatry and Psychology
ANKK1	25989041	2015	Mota et al	White	South	Psychiatry and Psychology
ANKK1	25989041	2015	Mota et al	White	South	Controls
ANKK1	26153084	2015	Tomaz et al	Not informed	Southwest	Psychiatry and Psychology
ANKK1	31144779	2019	Franco et al.	Not informed	South	Rheumatology
ANKK1	31144779	2019	Franco et al.	Not informed	South	Controls
ANKK1	31331851	2019	Gabardo et al.	Not informed	South	Dental and Oral Health
ANKK1	31868570	2019	Scariot et al.	Not informed	Southwest	Controls
ANKK1	31868570	2019	Scariot et al.	Not informed	Southwest	Dental and Oral Health
ANKK1	30353564	2018	Santos et al.	Not informed	Northeast	Psychiatry and Psychology
ANKK1	29791666	2018	Pinto et al.	Not informed	Southwest	Diverse
ANKK1	29791666	2018	Pinto et al.	Not informed	Southwest	Psychiatry and Psychology
ANKK1	30044466	2018	Feistauer et al.	Diverse	South	Healthy volunteers
ATIC	31867206	2020	Carvalho et al.	Admixed	North	Oncology
ATIC	31867206	2020	Carvalho et al.	Admixed	North	Controls
ATIC	30269037	2018	Carvalho et al.	Admixed	North	Oncology
BCR-ABL	25305168	2014	de França Azevedo et al	not informed	Northeast	Oncology
BCR-ABL	19557636	2009	Mascarenhas et al	not informed	Southwest	Oncology
BCR-ABL	19440970	2009	Mesquita et al	not informed	Center west	Oncology
BCR-ABL	28437552	2017	Vasconcelos et al.	Not informed	Northeast	Oncology
BCR-ABL	31280200	2019	Sales et al.	Not informed	Northeast	Oncology
BCR-ABL	28822797	2017	Pagnano et al.	Not informed	Southwest	Oncology
BRAF	24594201	2014	Carneiro et al	Admixed	Southwest	Oncology
BRAF	24594201	2014	Carneiro et al	Admixed	Southwest	Controls
BRAF	31310691	2019	Pereira et al.	Not informed	Southwest	Dermatology
BRAF	28454892	2017	Diniz et al.	Not informed	Southwest	Dental and Oral Health
BRAF	27038324	2016	Silva et al.	Not informed	Southwest	Genetic Disease
BRAF	27084044	2016	Pereira et al.	Not informed	Southwest	Dental and Oral Health
BRAF	27084044	2016	Pereira et al.	Not informed	Southwest	Dental and Oral Health
BRAF	27084044	2016	Pereira et al.	Not informed	Southwest	Dental and Oral Health
BRAF	31543246	2019	Coura et al.	Not informed	Southwest	Healthy volunteers
C-KIT	20651373	2010	Borges et al	Not Informed	North	Controls
C-KIT	20651373	2010	Borges et al	Not Informed	North	Oncology
Caffeine	32174823	2020	Coelho et al.	Not informed	Southwest	Healthy volunteers
Caffeine	31442620	2019	Cusinato et al.	Diverse	Southwest	Healthy volunteers
Caffeine	30445356	2019	Cusinato et al.	White	Southwest	Healthy volunteers
CBR3	31056713	2019	Paula et al.	Not informed	Southwest	Oncology
CCR5	11015158	2000	Accetturi et al	Not informed	Southwest	Infections and Infectious Diseases
CCR5	19212663	2009	Aoki et al	White	South	Oncology
CCR5	19212663	2009	Aoki et al	Black	South	Oncology
CCR5	19212663	2009	Aoki et al	White	South	Controls
CCR5	19212663	2009	Aoki et al	Black	South	Controls
CCR5	19212663	2009	Aoki et al	Mixed	South	Controls
CCR5	19212663	2009	Aoki et al	Not informed	South	Controls
CCR5	25716470	2015	Banin-Hirata et al	Not informed	South	Oncology
CCR5	25716470	2015	Banin-Hirata et al	Not informed	South	Controls
CCR5	17214851	2007	Brajão de Oliveira et al	Not informed	South	Infections and Infectious Diseases
CCR5	17214851	2007	Brajão de Oliveira et al	Not informed	South	Controls
CCR5	12532229	2003	Chies et al	Black	South	Controls
CCR5	12532229	2003	Chies et al	Black	Southwest	Controls
CCR5	12532229	2003	Chies et al	Not informed	South	Hematology
CCR5	12532229	2003	Chies et al	Not informed	Northeast	Hematology
CCR5	12532229	2003	Chies et al	White	South	Controls
CCR5	25825809	2015	Costa et al	White	Northeast	Infections and Infectious Diseases
CCR5	25825809	2015	Costa et al	Mixed	Northeast	Infections and Infectious Diseases
CCR5	25825809	2015	Costa et al	Not informed	Northeast	Infections and Infectious Diseases
CCR5	25825809	2015	Costa et al	Black	Northeast	Infections and Infectious Diseases
CCR5	25825809	2015	Costa et al	Not informed	Northeast	Controls
CCR5	17625759	2007	de Angelis et al	Not informed	Southwest	Infections and Infectious Diseases
CCR5	24822066	2014	de Oliveira et al	Not informed	South	Oncology
CCR5	24822066	2014	de Oliveira et al	Not informed	South	Controls
CCR5	16233918	2006	de Souza et al	Not informed	Northeast	Infections and Infectious Diseases
CCR5	16233918	2006	de Souza et al	Not informed	Northeast	Controls
CCR5	25638273	2015	de Souza et al	Not informed	Northeast	Infections and Infectious Diseases
CCR5	24330528	2013	Frade et al	Not informed	Diverse	Infections and Infectious Diseases
CCR5	12136242	2002	Grimaldi et al	Not informed	Northeast	Infections and Infectious Diseases
CCR5	12136242	2002	Grimaldi et al	Not informed	Northeast	Controls
CCR5	12136242	2002	Grimaldi et al	White	Northeast	Controls
CCR5	12136242	2002	Grimaldi et al	Native Tiriyó	North	Controls
CCR5	12136242	2002	Grimaldi et al	Native Waiampi	North	Controls
CCR5	17671738	2007	Kaimen-Maciel et al	Not informed	South	Psychiatry and Psychology
CCR5	17671738	2007	Kaimen-Maciel et al	Not informed	South	Controls
CCR5	17963165	2007	Kohem et al	Not informed	South	Rheumatology
CCR5	17963165	2007	Kohem et al	Not informed	South	Controls
CCR5	25548430	2014	Lopes et al	Black	Northeast	Hematology
CCR5	25548430	2014	Lopes et al	Black	Northeast	Controls
CCR5	23949585	2013	Melo et al	Not informed	South	Infections and Infectious Diseases
CCR5	23949585	2013	Melo et al	Not informed	South	Controls
CCR5	14533983	2003	Munerato et al	Not informed	Southwest	Infections and Infectious Diseases
CCR5	14533983	2003	Munerato et al	Not informed	Southwest	Controls
CCR5	23150742	2012	Nogueira et al	Not informed	Southwest	Infections and Infectious Diseases
CCR5	25064204	2014	Oliveira et al	Not informed	Southwest	Infections and Infectious Diseases
CCR5	18949389	2008	Reiche et al	Diverse	South	Infections and Infectious Diseases
CCR5	18949389	2008	Reiche et al	Diverse	South	Controls
CCR5	23632983	2013	Ribas et al	White	South	Controls
CCR5	23632983	2013	Ribas et al	Mixed	South	Controls
CCR5	23632983	2013	Ribas et al	Yellow	South	Controls
CCR5	23632983	2013	Ribas et al	Black	South	Controls
CCR5	23632983	2013	Ribas et al	Native	South	Controls
CCR5	23632983	2013	Ribas et al	White	South	Infections and Infectious Diseases
CCR5	23632983	2013	Ribas et al	Mixed	South	Infections and Infectious Diseases
CCR5	23632983	2013	Ribas et al	Yellow	South	Infections and Infectious Diseases
CCR5	23632983	2013	Ribas et al	Black	South	Infections and Infectious Diseases
CCR5	18855658	2008	Rigato et al	Not informed	Southwest	Infections and Infectious Diseases
CCR5	18855658	2008	Rigato et al	Not informed	Southwest	Controls
CCR5	23753295	2013	Schauren et al	White	South	Rheumatology
CCR5	23753295	2013	Schauren et al	Black	South	Rheumatology
CCR5	18189189	2008	Scheibel et al	White	South	Rheumatology
CCR5	18189189	2008	Scheibel et al	White	South	Rheumatology
CCR5	18189189	2008	Scheibel et al	White	South	Controls
CCR5	19460331	2009	Teixeira et al	White	Southwest	Infections and Infectious Diseases
CCR5	19460331	2009	Teixeira et al	Mixed	Southwest	Infections and Infectious Diseases
CCR5	19460331	2009	Teixeira et al	Black	Southwest	Infections and Infectious Diseases
CCR5	19460331	2009	Teixeira et al	White	Southwest	Controls
CCR5	19460331	2009	Teixeira et al	Mixed	Southwest	Controls
CCR5	19460331	2009	Teixeira et al	Black	Southwest	Controls
CCR5	24771092	2014	Telini et al	Not informed	South	Obstetrics and Gynecology
CCR5	24771092	2014	Telini et al	Not informed	South	Controls
CCR5	25701547	2015	Torres et al	Not informed	Northeast	Infections and Infectious Diseases
CCR5	16305685	2005	Vargas et al	Diverse	South	Hematology
CCR5	23632061	2013	Zambra et al	White	South	Urology
CCR5	23632061	2013	Zambra et al	White	South	Oncology
CCR5	23632061	2013	Zambra et al	White	South	Controls
CCR5	24016730	2013	Xavier-Carvalho et al	Not informed	Southwest	Infections and Infectious Diseases
CCR5	24016730	2013	Xavier-Carvalho et al	Not informed	Southwest	Controls
CCR5	22481870	2012	de Farias et al	Not informed	North	Infections and Infectious Diseases
CCR5	22481870	2012	de Farias et al	Diverse	North	Controls
CCR5	28358741	2017	Valverde-Villegas et al.	Diverse	South	Infections and Infectious Diseases
CCR5	28358741	2017	Valverde-Villegas et al.	Diverse	South	Controls
CCR5	29729320	2018	Troncoso et al.	White	Southwest	Psychiatry and Psychology
CCR5	29729320	2018	Troncoso et al.	White	South	Controls
CCR5	29729320	2018	Troncoso et al.	Black	Southwest	Psychiatry and Psychology
CCR5	29729320	2018	Troncoso et al.	Black	South	Controls
CCR5	28082621	2017	Toson et al.	Diverse	Diverse	Rheumatology
CCR5	28082621	2017	Toson et al.	Diverse	Diverse	Controls
CCR5	27388872	2016	Silva et al.	Admixed	Northeast	Infections and Infectious Diseases
CCR5	27388872	2016	Silva et al.	Admixed	Northeast	Controls
CCR5	26982176	2016	Santos et al.	Not informed	Northeast	Infections and Infectious Diseases
CCR5	31141020	2019	Ornelas et al.	Admixed	Southwest	Infections and Infectious Diseases
CCR5	31141020	2019	Ornelas et al.	Admixed	Southwest	Controls
CCR5	26599761	2015	Oliveira et al.	Not informed	Southwest	Infections and Infectious Diseases
CCR5	26599761	2015	Oliveira et al.	Not informed	Southwest	Infections and Infectious Diseases
CCR5	26599761	2015	Oliveira et al.	Not informed	Southwest	Controls
CCR5	30389547	2018	Matos et al.	Not informed	South	Infections and Infectious Diseases
CCR5	30389547	2018	Matos et al.	Not informed	Southwest	Infections and Infectious Diseases
CCR5	30389547	2018	Matos et al.	Not informed	Northeast	Infections and Infectious Diseases
CCR5	28595510	2017	Martin et al.	Not informed	South	Infections and Infectious Diseases
CCR5	31183980	2019	Mangieri et al.	Diverse	South	Infections and Infectious Diseases
CCR5	31183980	2019	Mangieri et al.	Diverse	South	Controls
CCR5	30786156	2018	Kaminski et al.	Diverse	Southwest	Obstetrics and Gynecology
CCR5	30786156	2018	Kaminski et al.	Diverse	Southwest	Controls
CCR5	28571570	2017	Gomes et al.	Not informed	North	Infections and Infectious Diseases
CCR5	29221851	2018	Faria Junior et al.	Not informed	Southwest	Infections and Infectious Diseases
CCR5	29221851	2018	Faria Junior et al.	Not informed	Southwest	Diverse
CCR5	29221851	2018	Faria Junior et al.	Not informed	Southwest	Controls
CCR5	31837381	2020	Ellwanger et al.	Diverse	South	Controls
CCR5	31837381	2020	Ellwanger et al.	Diverse	South	Infections and Infectious Diseases
CCR5	31837381	2020	Ellwanger et al.	Diverse	South	Infections and Infectious Diseases
CCR5	31837381	2020	Ellwanger et al.	White	South	Infections and Infectious Diseases
CCR5	31837381	2020	Ellwanger et al.	Not informed	South	Infections and Infectious Diseases
CCR5	29408489	2018	Ellwanger et al.	White	South	Controls
CCR5	29408489	2018	Ellwanger et al.	Not informed	South	Controls
CCR5	29408489	2018	Ellwanger et al.	White	South	Infections and Infectious Diseases
CCR5	29408489	2018	Ellwanger et al.	Not informed	South	Infections and Infectious Diseases
CCR5	29408489	2018	Ellwanger et al.	White	South	Infections and Infectious Diseases
CCR5	29408489	2018	Ellwanger et al.	Not informed	South	Infections and Infectious Diseases
CCR5	26944723	2016	Corado et al.	Not informed	North	Infections and Infectious Diseases
CCR5	28524801	2017	Cilião et al.	White	South	Nephrology
CCR5	28524801	2017	Cilião et al.	Black	South	Nephrology
CCR5	28524801	2017	Cilião et al.	Yellow	South	Nephrology
CCR5	28969941	2017	Cavalla et al.	Not informed	Southwest	Controls
CCR5	28969941	2017	Cavalla et al.	Not informed	Southwest	Dental and Oral Health
CCR5	28969941	2017	Cavalla et al.	Not informed	Southwest	Dental and Oral Health
CCR5	28969941	2017	Cavalla et al.	Not informed	Southwest	Dental and Oral Health
CCR5	32165289	2020	Carvalho-Silva et al.	Not informed	Northeast	Infections and Infectious Diseases
CCR5	29696014	2018	Batista et al.	Not informed	Northeast	Infections and Infectious Diseases
CCR5	26071874	2015	Baltus et al.	White	South	Rheumatology
CCR5	26071874	2015	Baltus et al.	Diverse	South	Rheumatology
CCR5	26071874	2015	Baltus et al.	Diverse	South	Controls
CCR5	28659473	2017	Arif et al.	Not informed	Southwest	Infections and Infectious Diseases
CCR5	29922960	2018	Lima et al.	Not informed	Southwest	Infections and Infectious Diseases
CCR5	21637640	2009	Boldt et al	Black	South	Healthy volunteers
CCR5	21637640	2009	Boldt et al	White Mennonites	South	Healthy volunteers
CCR5	21637640	2009	Boldt et al	Yellow	South	Healthy volunteers
CCR5	21637640	2009	Boldt et al	Native Guarani	Center west	Healthy volunteers
CCR5	21637640	2009	Boldt et al	Native Kaingang	South	Healthy volunteers
CCR5	12136242	2002	Grimaldi et al	Mixed	Northeast	Healthy volunteers
CCR5	12136242	2002	Grimaldi et al	White	South	Healthy volunteers
CCR5	12136242	2002	Grimaldi et al	Native American - Tiriyó	North	Healthy volunteers
CCR5	12136242	2002	Grimaldi et al	Native Waiampi	North	Healthy volunteers
CCR5	10598810	1999	Leboute et al	Native Tikuna Umariaçu	North	Healthy volunteers
CCR5	10598810	1999	Leboute et al	Native Tikuna Feijoal	North	Healthy volunteers
CCR5	10598810	1999	Leboute et al	Native Tikuna Vendaval	North	Healthy volunteers
CCR5	10598810	1999	Leboute et al	Native Tikuna Belém	North	Healthy volunteers
CCR5	10598810	1999	Leboute et al	Native Baniw	North	Healthy volunteers
CCR5	10598810	1999	Leboute et al	Native Kashinawa	North	Healthy volunteers
CCR5	10598810	1999	Leboute et al	Native Kanamari	North	Healthy volunteers
CCR5	18623133	2008	Muxel et al	White	South	Healthy volunteers
CCR5	9657277	1998	Passos Jr et al	Not informed	Southwest	Healthy volunteers
CCR5	16501811	2006	Vargas et al	White	South	Healthy volunteers
CCR5	16501811	2006	Vargas et al	Mixed	South	Healthy volunteers
CCR5	16501811	2006	Vargas et al	Black	South	Healthy volunteers
CCR5	26436495	2015	Ferreira-Fernandes et al.	Mixed	Northeast	Healthy volunteers
CES1	22688218	2013	Bruxel et al	Not informed	South	Psychiatry and Psychology
CFTR	15665983	2005	Araujo et al	not informed	North	Several
CFTR	10794365	2001	Bernardino et al	White	Southwest	Several
CFTR	10794365	2001	Bernardino et al	Mixed	Southwest	Several
CFTR	14526128	2003	Bernardino et al	White	Southwest	Gastroenterology
CFTR	14526128	2003	Bernardino et al	Mixed	Southwest	Gastroenterology
CFTR	14526128	2003	Bernardino et al	Yellow	Southwest	Gastroenterology
CFTR	14526128	2003	Bernardino et al	White	Southwest	Controls
CFTR	14526128	2003	Bernardino et al	Mixed	Southwest	Controls
CFTR	14526128	2003	Bernardino et al	Yellow	Southwest	Controls
CFTR	16581722	2006	Bertuzzo e Pinto Jr	White	Southwest	Several
CFTR	24583165	2014	Bonadia et al	White	Southwest	Several
CFTR	21110105	2011	Brunoro et al	not informed	Southwest	Obstetrics and Gynecology
CFTR	11459421	2001	Cabello et al	Mixed	Southwest	Several
CFTR	16114821	2005	Cabello et al	not informed	Southwest	Several
CFTR	16837565	2006b	Cabello et al	not informed	Southwest	Several
CFTR	16715841	2006a	Cabello et al	not informed	Southwest	Several
CFTR	24959313	2014	Coutinho et al	not informed	Southwest	Several
CFTR	19077469	2009	da Costa et al	White	Southwest	Diverse
CFTR	19077469	2009	da Costa et al	Black	Southwest	Diverse
CFTR	19077469	2009	da Costa et al	Mixed	Southwest	Diverse
CFTR	19077469	2009	da Costa et al	Yellow	Southwest	Diverse
CFTR	19077469	2009	da Costa et al	White	Southwest	Psychiatry and Psychology
CFTR	19077469	2009	da Costa et al	Black	Southwest	Psychiatry and Psychology
CFTR	19077469	2009	da Costa et al	Mixed	Southwest	Psychiatry and Psychology
CFTR	19077469	2009	da Costa et al	Native American	Southwest	Psychiatry and Psychology
CFTR	19077469	2009	da Costa et al	White	Southwest	Controls
CFTR	19077469	2009	da Costa et al	Black	Southwest	Controls
CFTR	19077469	2009	da Costa et al	Mixed	Southwest	Controls
CFTR	23670503	2013	Dal`Maso et al	White	South	Several
CFTR	23670503	2013	Dal`Maso et al	not informed	South	Several
CFTR	23670503	2013	de Lima Marson et al	not informed	Southwest	Several
CFTR	17718859	2007	Faucz et al	White	South	Several
CFTR	17718859	2007	Faucz et al	White	South	Several
CFTR	14527202	2003	Goloni-Bertollo et al	not informed	Southwest	Several
CFTR	19219329	2008	Grotta et al	not informed	Southwest	Several
CFTR	22407040	2012	Lima et al	White	Southwest	Several
CFTR	22407040	2012	Lima et al	Black	Southwest	Several
CFTR	22950544	2012	Marson et al	White	Southwest	Several
CFTR	22950544	2012	Marson et al	not informed	Southwest	Several
CFTR	22874010	2012b	Marson et al	White	Southwest	Several
CFTR	22874010	2012b	Marson et al	Black	Southwest	Several
CFTR	23758905	2013	Marson et al	Not informed - pacientes	Southwest	Several
CFTR	24593045	2014	Marson et al	not informed	Southwest	Several
CFTR	24593045	2014	Marson et al	White	Southwest	Several
CFTR	25176415	2014	Martins et al	Black	Southwest	Several
CFTR	18078202	2007	Moura Costa et al	Mixed	Northeast	Several
CFTR	25667564	2015	Ng et al	White	Southwest	Several
CFTR	25667564	2015	Ng et al	not informed	Southwest	Controls
CFTR	20098842	2010	Perone et al	not informed	Southwest	Several
CFTR	9972102	1999	Raskin et al	White	South	Several
CFTR	9972102	1999	Raskin et al	White	South	Several
CFTR	9972102	1999	Raskin et al	White	South	Several
CFTR	9972102	1999	Raskin et al	White	Southwest	Several
CFTR	9972102	1999	Raskin et al	White	Southwest	Several
CFTR	14641997	2003	Raskin et al	White	South	Several
CFTR	14641997	2003	Raskin et al	White	South	Several
CFTR	14641997	2003	Raskin et al	White	Southwest	Several
CFTR	14641997	2003	Raskin et al	Black	Southwest	Several
CFTR	17544945	2008	Raskin et al	Black	South	Controls
CFTR	17544945	2008	Raskin et al	White	South	Controls
CFTR	17544945	2008	Raskin et al	White	South	Controls
CFTR	17544945	2008	Raskin et al	White	Southwest	Controls
CFTR	17544945	2008	Raskin et al	White	South	Controls
CFTR	17544945	2008	Raskin et al	White	Southwest	Controls
CFTR	12706377	1999	Streit et al	not informed	South	Several
CFTR	18797695	2008	Vidigal et al	White	Southwest	Several
CFTR	18797695	2008	Vidigal et al	not informed	Southwest	Several
CFTR	28160168	2017	Souza et al.	Black	Southwest	Controls
CFTR	28160168	2017	Souza et al.	Black	Southwest	Several
CFTR	28160168	2017	Souza et al.	Black	Northeast	Several
CFTR	29635781	2018	Pereira et al.	White	Southwest	Several
CFTR	29635781	2018	Pereira et al.	Not informed	Southwest	Several
CFTR	28756021	2017	Pereira et al.	White	Southwest	Several
CFTR	28756021	2017	Pereira et al.	Not informed	Southwest	Several
CFTR	32356101	2020	Pascoal et al.	Not informed	Southwest	Several
CFTR	28771972	2017	Nunes et al.	Not informed	Southwest	Several
CFTR	31199594	2019	Martins et al.	Diverse	Southwest	Several
CFTR	28719800	2017	Furlan et al.	Not informed	Southwest	Several
CFTR	32819855	2020	da Silva Filho et al.	White	Diverse	Several
CFTR	32819855	2020	da Silva Filho et al.	Black	Diverse	Several
CFTR	32819855	2020	da Silva Filho et al.	Mixed	Diverse	Several
CFTR	32819855	2020	da Silva Filho et al.	Not informed	Diverse	Several
CFTR	32185651	2020	Rispoli et al.	Not informed	South	Several
CFTR	29378680	2018	Pu et al.	Not informed	Southwest	Several
CFTR	31734731	2019	Procianoy et al.	Not informed	South	Several
CFTR	30996306	2019	Pereira et al.	White	Southwest	Several
CFTR	30996306	2019	Pereira et al.	Not informed	Southwest	Several
CFTR	28888897	2017	Nascimento et al.	Not informed	Northeast	Several
CFTR	28888897	2017	Nascimento et al.	Not informed	Northeast	Several
CFTR	30716472	2019	Kmit et al.	Not informed	Southwest	Several
CFTR	30716472	2019	Kmit et al.	Not informed	Southwest	Controls
CFTR	27784314	2016	Faria et al.	Not informed	Southwest	Several
CFTR	30726326	2018	da Rosa et al.	Not informed	South	Several
CFTR	28455785	2017	Ferreira et al.	White	Southwest	Several
CFTR	28455785	2017	Ferreira et al.	Not informed	Southwest	Several
CFTR	31606405	2019	Coutinho et al.	Not informed	Southwest	Several
CFTR	31213628	2019	Olm et al.	Diverse	Southwest	Several
CFTR	29054758	2017	Furgeri et al.	Not informed	Southwest	Several
CFTR	29054758	2017	Furgeri et al.	Not informed	Southwest	Controls
CFTR	16485779	2005	Heckmann et al	not informed	North	Healthy volunteers
CFTR	16485779	2005	Heckmann et al	not informed	North	Healthy volunteers
CFTR	16485779	2005	Heckmann et al	not informed	North	Healthy volunteers
CFTR	16485779	2005	Heckmann et al	not informed	North	Healthy volunteers
CFTR	18078202	2007	Moura Costa et al	Mixed	Northeast	Healthy volunteers
CFTR	17985657	2007	Raskin et al	Native Kaigang	South	Healthy volunteers
CFTR	17985657	2007	Raskin et al	Native Guarani	South	Healthy volunteers
CFTR	28002612	2016	Lanes	not informed	Southwest	Healthy volunteers
CFTR	28002612	2016	Lanes	White	Southwest	Healthy volunteers
CFTR	28771972	2017	Nunes et al.	Not informed	Southwest	Healthy volunteers
CFTR	29124052	2017	Faria et al.	Not informed	Southwest	Healthy volunteers
CFTR	29731357	2018	Rispoli et al.	Not informed	South	Healthy volunteers
COMT	21120493	2012	Barbosa et al	Not informed	Southwest	Rheumatology
COMT	21120493	2012	Barbosa et al	Not informed	Southwest	Controls
COMT	21495799	2011	Christofolini et al	Not informed	Southwest	Obstetrics and Gynecology
COMT	21495799	2011	Christofolini et al	Not informed	Southwest	Controls
COMT	23131881	2012	Contini et al	White	South	Psychiatry and Psychology
COMT	23295417	2012	Cordeiro et al	Not informed	Southwest	Psychiatry and Psychology
COMT	23295417	2012	Cordeiro et al	Not informed	Southwest	Controls
COMT	24808926	2014	Cordts et al	Not informed	Southwest	Obstetrics and Gynecology
COMT	24808926	2014	Cordts et al	Not informed	Southwest	Controls
COMT	18752908	2008	de Oliveira et al	White	Southwest	Obstetrics and Gynecology
COMT	18752908	2008	de Oliveira et al	Diverse	Southwest	Obstetrics and Gynecology
COMT	18752908	2008	de Oliveira et al	White	Southwest	Controls
COMT	18752908	2008	de Oliveira et al	Diverse	Southwest	Controls
COMT	21716904	2011	dos Santos et al	Not informed	Southwest	Oncology
COMT	21716904	2011	dos Santos et al	Not informed	Southwest	Controls
COMT	15005715	2004	Meira-Lima et al	White	Southwest	Psychiatry and Psychology
COMT	15005715	2004	Meira-Lima et al	Not informed	Southwest	Psychiatry and Psychology
COMT	15005715	2004	Meira-Lima et al	White	Southwest	Controls
COMT	15005715	2004	Meira-Lima et al	Not informed	Southwest	Controls
COMT	21625751	2011	Miguita et al	Not informed	Southwest	Psychiatry and Psychology
COMT	22922787	2012	Pereira et al	Not informed	Southwest	Psychiatry and Psychology
COMT	22922787	2012	Pereira et al	Not informed	Southwest	Controls
COMT	21550019	2011	Salatino-Oliveira et al	White	South	Psychiatry and Psychology
COMT	21550019	2012	Salatino-Oliveira et al	White	South	Psychiatry and Psychology
COMT	21550019	2012	Salatino-Oliveira et al	Non-European-Brazilian	South	Psychiatry and Psychology
COMT	22713126	2012b	Soeiro-de-Souza et al	Not informed	Southwest	Psychiatry and Psychology
COMT	22713126	2012b	Soeiro-de-Souza et al	Not informed	Southwest	Controls
COMT	21080103	2011	Valente et al	Not informed	Southwest	Controls
COMT	21080103	2011	Valente et al	Not informed	Southwest	Psychiatry and Psychology
COMT	31264537	2019	Bonato et al.	Not informed	Southwest	Rheumatology
COMT	31285095	2019	Tesch et al.	Not informed	Southwest	Controls
COMT	31721892	2020	Brunoni et al.	Diverse	Southwest	Psychiatry and Psychology
COMT	30794329	2019	Santos et al.	Not informed	Northeast	Psychiatry and Psychology
COMT	31868570	2019	Scariot et al.	Not informed	Southwest	Dental and Oral Health
COMT	31868570	2019	Scariot et al.	Not informed	Southwest	Controls
COMT	30642702	2018	Scariot et al.	White	South	Dental and Oral Health
COMT	30642702	2018	Scariot et al.	Yellow	South	Dental and Oral Health
COMT	30642702	2018	Scariot et al.	Mixed	South	Dental and Oral Health
COMT	30642702	2018	Scariot et al.	Black	South	Dental and Oral Health
COMT	30642702	2018	Scariot et al.	White	South	Controls
COMT	30642702	2018	Scariot et al.	Yellow	South	Controls
COMT	30642702	2018	Scariot et al.	Mixed	South	Controls
COMT	30642702	2018	Scariot et al.	Black	South	Controls
COMT	29578580	2019	Sampaio et al.	Not informed	Northeast	Psychiatry and Psychology
COMT	28562378	2017	Moraes et al.	Not informed	North	Psychiatry and Psychology
COMT	28562378	2017	Moraes et al.	Not informed	North	Controls
COMT	26687156	2015	Melo-Felippe et al.	Not informed	Southwest	Psychiatry and Psychology
COMT	26687156	2015	Melo-Felippe et al.	Not informed	Southwest	Controls
COMT	28273278	2017	Matsuzaka et al.	Diverse	Southwest	Psychiatry and Psychology
COMT	28273278	2017	Matsuzaka et al.	Diverse	Southwest	Controls
COMT	31156495	2019	Julio-Costa et al.	Not informed	Southwest	Psychiatry and Psychology
COMT	32076105	2019	Fassini et al.	Not informed	Southwest	Nutrition
COMT	27458360	2016	Costa et al.	Not informed	Southwest	Several
COMT	32471213	2020	Vieira et al.	Not informed	Southwest	Dental and Oral Health
COMT	32471213	2020	Vieira et al.	Not informed	Southwest	Controls
COMT	32989615	2020	Silva et al.	Not informed	Northeast	Pediatrics and Neonatology
COMT	30811655	2019	Brancher et al.	Not informed	South	Rheumatology
COMT	31539757	2019	De Marchi et al.	Not informed	Southwest	Oncology
COMT	32294749	2020	Santos-Lobato et al.	Not informed	Southwest	Psychiatry and Psychology
COMT	31868570	2019	Scariot et al.	Not informed	Southwest	Controls
COMT	31868570	2019	Scariot et al.	Not informed	Southwest	Dental and Oral Health
COMT	24956262	2014	Lage et al	White	Southwest	Healthy volunteers
COMT	24039968	2014	Malloy-Diniz et al	not informed	Southwest	Healthy volunteers
COMT	23440431	2013a	Soeiro-de-Souza et al	not informed	Southwest	Healthy volunteers
COMT	23818048	2013b	Soeiro-de-Souza et al	not informed	Southwest	Healthy volunteers
COMT	21530215	2012	Galvão et al	not informed	South	Healthy volunteers
COMT	21530215	2012	Galvão et al	White	South	Healthy volunteers
COMT	16130011	2005	Almeida et al	White	South	Healthy volunteers
COMT	31095973	2019	Fassini et al.	not informed	Southwest	Healthy volunteers
COMT	28534928	2017	Mariath et al.	Not informed	South	Healthy volunteers
COMT	30841785	2019	Nogueira et al.	Not informed	Southwest	Healthy volunteers
COMT	27327562	2016	Akutagava-Martins et al	Diverse	South	Healthy volunteers
COMT	27426045	2016	Salatino-Oliveira et al.	Diverse	South	Healthy volunteers
COMT	30688541	2019	Polerá	not informed	Southwest	Healthy volunteers
COMT	29713005	2018	Rodrigues-Soares et al.	Diverse	South	Healthy volunteers
COMT	29713005	2018	Rodrigues-Soares et al.	Diverse	Southwest	Healthy volunteers
COMT	29713005	2018	Rodrigues-Soares et al.	Diverse	Northeast	Healthy volunteers
CRHR1	26689393	2015	Bortoluzzi et al.	White	South	Psychiatry and Psychology
CRHR1	26689393	2015	Bortoluzzi et al.	Diverse	South	Psychiatry and Psychology
CRHR1	26689393	2015	Bortoluzzi et al.	White	South	Controls
CRHR1	26689393	2015	Bortoluzzi et al.	Diverse	South	Controls
CRHR1	28237884	2017	Rovaris et al.	White	South	Psychiatry and Psychology
CRHR1	28237884	2017	Rovaris et al.	Not informed	South	Psychiatry and Psychology
CRHR1	28237884	2017	Rovaris et al.	White	South	Controls
CRHR1	28237884	2017	Rovaris et al.	Not informed	South	Controls
CRHR1	27894002	2016	Bastos et al.	White	South	Controls
CRHR1	27894002	2016	Bastos et al.	Not informed	South	Controls
CRHR1	27894002	2016	Bastos et al.	White	South	Psychiatry and Psychology
CRHR1	27894002	2016	Bastos et al.	Not informed	South	Psychiatry and Psychology
CRHR1	27894002	2016	Bastos et al.	White	South	Psychiatry and Psychology
CRHR1	27894002	2016	Bastos et al.	Not informed	South	Psychiatry and Psychology
CRHR1	27544317	2016	Silva et al.	White	South	Psychiatry and Psychology
CRHR1	27397864	2016	Rovaris et al.	Not informed	South	Psychiatry and Psychology
CYP1A1	15013696	2004	Amorim et al	Mixed	Southwest	Controls
CYP1A1	15013696	2004	Amorim et al	Diverse	Southwest	Diverse
CYP1A1	20579990	2010	Barão et al	Diverse	Southwest	Obstetrics and Gynecology
CYP1A1	20579990	2010	Barão et al	Diverse	Southwest	Controls
CYP1A1	23278115	2013	Barbieri et al	Diverse	Southwest	Oncology
CYP1A1	23278115	2013	Barbieri et al	Diverse	Southwest	Controls
CYP1A1	17158763	2006	Bufalo et al	White	Southwest	Oncology
CYP1A1	17158763	2006	Bufalo et al	Not informed	Southwest	Oncology
CYP1A1	17158763	2006	Bufalo et al	White	Southwest	Controls
CYP1A1	17158763	2006	Bufalo et al	Not informed	Southwest	Controls
CYP1A1	17980001	2008	Bufalo et al	White	Southwest	Endocrinology
CYP1A1	17980001	2008	Bufalo et al	Not informed	Southwest	Endocrinology
CYP1A1	17980001	2008	Bufalo et al	White	Southwest	Controls
CYP1A1	17980001	2008	Bufalo et al	Not informed	Southwest	Controls
CYP1A1	15215328	2004	Burim et al	Diverse	Southwest	Diverse
CYP1A1	15215328	2004	Burim et al	Diverse	Southwest	Diverse
CYP1A1	15215328	2004	Burim et al	Diverse	Southwest	Psychiatry and Psychology
CYP1A1	15215328	2004	Burim et al	White	Southwest	Controls
CYP1A1	15215328	2004	Burim et al	Black	Southwest	Controls
CYP1A1	15215328	2004	Burim et al	Mixed	Southwest	Controls
CYP1A1	14991750	2004	Canalle et al	White	Southwest	Oncology
CYP1A1	14991750	2004	Canalle et al	Black	Southwest	Oncology
CYP1A1	14991750	2004	Canalle et al	Mixed	Southwest	Oncology
CYP1A1	14991750	2004	Canalle et al	White	Southwest	Controls
CYP1A1	14991750	2004	Canalle et al	Black	Southwest	Controls
CYP1A1	14991750	2004	Canalle et al	Mixed	Southwest	Controls
CYP1A1	21590276	2012	Cury et al	Not informed	Southwest	Oncology
CYP1A1	21590276	2012	Cury et al	Not informed	Southwest	Controls
CYP1A1	12175533	2002	da Fonte de Amorim et al	White	Southwest	Oncology
CYP1A1	12175533	2002	da Fonte de Amorim et al	Not informed	Southwest	Oncology
CYP1A1	12175533	2002	da Fonte de Amorim et al	White	Southwest	Controls
CYP1A1	12175533	2002	da Fonte de Amorim et al	Not informed	Southwest	Controls
CYP1A1	21716904	2011	dos Santos et al	Not informed	Southwest	Oncology
CYP1A1	21716904	2011	dos Santos et al	Not informed	Southwest	Controls
CYP1A1	18507060	2008	Duarte et al	Not informed	Southwest	Dental and Oral Health
CYP1A1	18507060	2008	Duarte et al	Not informed	Southwest	Controls
CYP1A1	16721740	2006	Gattás et al	White	Southwest	Oncology
CYP1A1	16721740	2006	Gattás et al	Not informed	Southwest	Oncology
CYP1A1	16721740	2006	Gattás et al	White	Southwest	Controls
CYP1A1	16721740	2006	Gattás et al	Not informed	Southwest	Controls
CYP1A1	24981927	2014	Glesse et al	White	South	Rheumatology
CYP1A1	24981927	2014	Glesse et al	Black	South	Rheumatology
CYP1A1	18979064	2009	Grando et al	White	South	Oncology
CYP1A1	18979064	2009	Grando et al	Black	South	Oncology
CYP1A1	18979064	2009	Grando et al	Yellow	South	Oncology
CYP1A1	18979064	2009	Grando et al	White	South	Controls
CYP1A1	18979064	2009	Grando et al	Black	South	Controls
CYP1A1	18979064	2009	Grando et al	Yellow	South	Controls
CYP1A1	7534543	1995	Hamada et al	White	Southwest	Oncology
CYP1A1	7534543	1995	Hamada et al	Mixed	Southwest	Oncology
CYP1A1	7534543	1995	Hamada et al	Black	Southwest	Oncology
CYP1A1	7534543	1995	Hamada et al	White	Southwest	Controls
CYP1A1	7534543	1995	Hamada et al	Mixed	Southwest	Controls
CYP1A1	7534543	1995	Hamada et al	Black	Southwest	Controls
CYP1A1	19750329	2009	Honma et al	White	Southwest	Oncology
CYP1A1	19750329	2009	Honma et al	Black	Southwest	Oncology
CYP1A1	19750329	2009	Honma et al	White	Southwest	Controls
CYP1A1	19750329	2009	Honma et al	Black	Southwest	Controls
CYP1A1	17160265	2006	Leichsenring et al	Not informed	South	Oncology
CYP1A1	17160265	2006	Leichsenring et al	Not informed	South	Controls
CYP1A1	18647550	2008	Lima Jr et al	Not informed	Southwest	Urology
CYP1A1	18647550	2008	Lima Jr et al	Not informed	Southwest	Oncology
CYP1A1	18507050	2008	Losi-Guembarovski et al	Not informed	South	Oncology
CYP1A1	18507050	2008	Losi-Guembarovski et al	Not informed	South	Controls
CYP1A1	21870186	2011	Lourenço et al	White	Southwest	Oncology
CYP1A1	21870186	2011	Lourenço et al	Black	Southwest	Oncology
CYP1A1	21870186	2011	Lourenço et al	White	Southwest	Controls
CYP1A1	21870186	2011	Lourenço et al	Black	Southwest	Controls
CYP1A1	16488179	2006	Marques et al	White	Southwest	Oncology
CYP1A1	16488179	2006	Marques et al	Mixed	Southwest	Oncology
CYP1A1	16488179	2006	Marques et al	Black	Southwest	Oncology
CYP1A1	16488179	2006	Marques et al	White	Southwest	Controls
CYP1A1	16488179	2006	Marques et al	Mixed	Southwest	Controls
CYP1A1	16488179	2006	Marques et al	Black	Southwest	Controls
CYP1A1	25150952	2014	Matsuzaki et al	Black	Southwest	Obstetrics and Gynecology
CYP1A1	25150952	2014	Matsuzaki et al	Not informed	Southwest	Obstetrics and Gynecology
CYP1A1	25150952	2014	Matsuzaki et al	Black	Southwest	Controls
CYP1A1	25150952	2014	Matsuzaki et al	Not informed	Southwest	Controls
CYP1A1	22782580	2012	Moraes et al	Not informed	Diverse	Oncology
CYP1A1	18409146	2008	Pereira Serafim et al	Not informed	Southwest	Oncology
CYP1A1	18409146	2008	Pereira Serafim et al	Not informed	Southwest	Controls
CYP1A1	19543899	2009	Rapozo et al	Not informed	Southwest	Gastroenterology
CYP1A1	19543899	2009	Rapozo et al	Not informed	Southwest	Gastroenterology
CYP1A1	21086258	2010	Reis et al 2010	Not informed	Center west	Endocrinology
CYP1A1	21086258	2010	Reis et al 2011	Not informed	Center west	Controls
CYP1A1	20884258	2011	Rodrigues et al	White	South	Oncology
CYP1A1	20884258	2011	Rodrigues et al	White	South	Controls
CYP1A1	19229255	2009	Shimada et al	Not informed	Southwest	Oncology
CYP1A1	19229255	2009	Shimada et al	Not informed	Southwest	Controls
CYP1A1	19229255	2009	Shimada et al	Yellow	Southwest	Oncology
CYP1A1	19229255	2009	Shimada et al	Yellow	Southwest	Controls
CYP1A1	18618215	2008	Torresan et al	White	South	Oncology
CYP1A1	18618215	2008	Torresan et al	White	South	Controls
CYP1A1	20962519	2010	Yamaguti et al	White	Southwest	Oncology
CYP1A1	20962519	2010	Yamaguti et al	White	Southwest	Controls
CYP1A1	19442564	2009	Olivieri et al	Diverse	Southwest	Oncology
CYP1A1	19442564	2009	Olivieri et al	Not informed	Southwest	Controls
CYP1A1	7581485	1995	Sugimura et al	White	Southwest	Oncology
CYP1A1	7581485	1995	Sugimura et al	Mixed	Southwest	Oncology
CYP1A1	7581485	1995	Sugimura et al	Black	Southwest	Oncology
CYP1A1	7581485	1995	Sugimura et al	White	Southwest	Controls
CYP1A1	7581485	1995	Sugimura et al	Mixed	Southwest	Controls
CYP1A1	7581485	1995	Sugimura et al	Black	Southwest	Controls
CYP1A1	28018104	2016	Fernandes et al.	Not informed	Southwest	Controls
CYP1A1	28018104	2016	Fernandes et al.	Not informed	Southwest	Oncology
CYP1A1	28052106	2017	Silva-Alves et al.	Not informed	Southwest	Psychiatry and Psychology
CYP1A1	31539757	2019	De Marchi et al.	Not informed	Southwest	Oncology
CYP1A1	27323100	2016	Silva et al.	Not informed	Center west	Obstetrics and Gynecology
CYP1A1	27323100	2016	Silva et al.	Not informed	Center west	Controls
CYP1A1	16864595	2007	Abnet et al	Not informed	South	Healthy volunteers
CYP1A1	12365037	2002	Gaspar et al	Native Xavante	Center west	Healthy volunteers
CYP1A1	12365037	2002	Gaspar et al	Native Guarani	Center west	Healthy volunteers
CYP1A1	12365037	2002	Gaspar et al	Native Wai Wai	North	Healthy volunteers
CYP1A1	12365037	2002	Gaspar et al	Native Zoró	Center west	Healthy volunteers
CYP1A1	12365037	2002	Gaspar et al	Native Surui	Center west	Healthy volunteers
CYP1A1	12365037	2002	Gaspar et al	Native Gavião	Center west	Healthy volunteers
CYP1A1	21637445	2009	Maciel et al	Black	South	Healthy volunteers
CYP1A1	21637445	2009	Maciel et al	White	South	Healthy volunteers
CYP1A1	16130011	2005	Almeida et al	White	South	Healthy volunteers
CYP1A1	22782580	2012	da Rosa et al	White	South	Healthy volunteers
CYP1A1	22782580	2012	da Rosa et al	Not informed	South	Healthy volunteers
CYP1A1	18550589	2008	da Silva et al	Not informed	South	Healthy volunteers
CYP1A1	16914185	2006	do Vale Bosso	Not informed	Southwest	Healthy volunteers
CYP1A1	17292523	2007	Heuser et al	Not informed	South	Healthy volunteers
CYP1A1	31787382	2020	Souza et al.	Not informed	South	Healthy volunteers
CYP1A1	30119983	2018	Miranda et al.	White	Southwest	Healthy volunteers
CYP1A1	30119983	2018	Miranda et al.	Diverse	Southwest	Healthy volunteers
CYP1A1	30119983	2018	Miranda et al.	Black	Southwest	Healthy volunteers
CYP1A1	29713005	2018	Rodrigues-Soares et al.	Diverse	South	Healthy volunteers
CYP1A1	29713005	2018	Rodrigues-Soares et al.	Diverse	Southwest	Healthy volunteers
CYP1A1	29713005	2018	Rodrigues-Soares et al.	Diverse	Northeast	Healthy volunteers
CYP1A2	23278115	2013	Barbieri et al	Diverse	Southwest	Oncology
CYP1A2	23278115	2013	Barbieri et al	Diverse	Southwest	Controls
CYP1A2	19229255	2009	Shimada et al	Not informed	Southwest	Oncology
CYP1A2	19229255	2009	Shimada et al	Not informed	Southwest	Controls
CYP1A2	19229255	2009	Shimada et al	Yellow	Southwest	Oncology
CYP1A2	19229255	2009	Shimada et al	Yellow	Southwest	Controls
CYP1A2	19442564	2009	Olivieri et al	Diverse	Southwest	Oncology
CYP1A2	19442564	2009	Olivieri et al	Not informed	Southwest	Controls
CYP1A2	23601795	2013	Kohlrausch et al	White	South	Psychiatry and Psychology
CYP1A2	28052106	2017	Silva-Alves et al.	Not informed	Southwest	Psychiatry and Psychology
CYP1A2	27767381	2016	Sortica et al.	Admixed	North	Infections and Infectious Diseases
CYP1A2	26530626	2015	Brito et al.	Not informed	Center west	Controls
CYP1A2	26530626	2015	Brito et al.	White	Center west	Psychiatry and Psychology
CYP1A2	26530626	2015	Brito et al.	Black	Center west	Psychiatry and Psychology
CYP1A2	26530626	2015	Brito et al.	Not informed	Center west	Psychiatry and Psychology
CYP1A2	31539757	2019	De Marchi et al.	Not informed	Southwest	Oncology
CYP1A2	32298597	2020	Trujillo-Paolilo et al	White	Southwest	Oncology
CYP1A2	32298597	2020	Trujillo-Paolilo et al	Mixed	Southwest	Oncology
CYP1A2	32298597	2020	Trujillo-Paolilo et al	Black	Southwest	Oncology
CYP1A2	30392849	2018	Coelho et al.	Admixed	Northeast	Infections and Infectious Diseases
CYP1A2	16864595	2007	Abnet et al 2007	Not informed	South	Healthy volunteers
CYP1A2	24443221	2014	Kohlrausch et al	White	South	Healthy volunteers
CYP1A2	24443221	2014	Kohlrausch et al	Black	South	Healthy volunteers
CYP1A2	16130011	2005	Almeida et al	White	South	Healthy volunteers
CYP1A2	29522901	2018	Soares et al.	Not informed	South	Healthy volunteers
CYP1A2	31442620	2019	Cusinato et al.	Diverse	Southwest	Healthy volunteers
CYP1A2	29713005	2018	Rodrigues-Soares et al.	Diverse	South	Healthy volunteers
CYP1A2	29713005	2018	Rodrigues-Soares et al.	Diverse	Southwest	Healthy volunteers
CYP1A2	29713005	2018	Rodrigues-Soares et al.	Diverse	Northeast	Healthy volunteers
CYP2B6	23996099	2013	Coelho et al	Black	Northeast	Infections and Infectious Diseases
CYP2B6	23996099	2013	Coelho et al	White	Northeast	Infections and Infectious Diseases
CYP2B6	25271170	2015	Fernandes et al	Black	North	Infections and Infectious Diseases
CYP2B6	25271170	2015	Fernandes et al	White	North	Infections and Infectious Diseases
CYP2B6	25271170	2015	Fernandes et al	Native	North	Infections and Infectious Diseases
CYP2B6	23684483	2013	Palodetto et al	Not informed	Southwest	Oncology
CYP2B6	26153084	2015	Tomaz et al	Not informed	Southwest	Psychiatry and Psychology
CYP2B6	29868865	2018	Almeida et al.	Admixed	Southwest	Infections and Infectious Diseases
CYP2B6	30392849	2018	Coelho et al.	Admixed	Northeast	Infections and Infectious Diseases
CYP2B6	28083951	2017	Castro et al.	Not informed	Southwest	Psychiatry and Psychology
CYP2B6	28083951	2017	Castro et al.	Not informed	Southwest	Rheumatology
CYP2B6	26947771	2016	Moraes et al.	Not informed	Southwest	Diverse
CYP2B6	28492729	2017	MÜller et al.	White	South	Infections and Infectious Diseases
CYP2B6	28492729	2017	MÜller et al.	Black	South	Infections and Infectious Diseases
CYP2B6	28492729	2017	MÜller et al.	White	South	Infections and Infectious Diseases
CYP2B6	28492729	2017	MÜller et al.	Black	South	Infections and Infectious Diseases
CYP2B6	31056713	2019	Paula et al.	Not informed	Southwest	Oncology
CYP2B6	31402421	2019	Tomaz et al.	Not informed	Southwest	Diverse
CYP2B6	27940179	2016	Queiroz et al.	Not informed	North	Infections and Infectious Diseases
CYP2B6	26141406	2015	Mourão et al.	White	South	Diverse
CYP2B6	26141406	2015	Mourão et al.	Not informed	South	Diverse
CYP2B6	31539757	2019	De Marchi et al.	Not informed	Southwest	Oncology
CYP2B6	29713005	2018	Rodrigues-Soares et al.	Diverse	South	Healthy volunteers
CYP2B6	29713005	2018	Rodrigues-Soares et al.	Diverse	Southwest	Healthy volunteers
CYP2B6	29713005	2018	Rodrigues-Soares et al.	Diverse	Northeast	Healthy volunteers
CYP2C8	28316087	2017	Gengivir et al.	Not informed	Southwest	Nephrology
CYP2C8	31849280	2020	Gengivir et al.	Diverse	Southwest	Nephrology
CYP2C8	31123858	2019	Castro et al.	Not informed	Southwest	Oncology
CYP2C8	29389962	2016	Silvino et al.	Not informed	Center west	Infections and Infectious Diseases
CYP2C8	27767381	2016	Sortica et al.	Admixed	North	Infections and Infectious Diseases
CYP2C8	31547827	2019	Daher et al.	Not informed	Diverse	Infections and Infectious Diseases
CYP2C8	31539757	2019	De Marchi et al.	Not informed	Southwest	Oncology
CYP2C8	21977947	2012	Vargens et al	Native American - Guarani-Kaiowá	Diverse	Healthy volunteers
CYP2C8	21977947	2012	Vargens et al	Native American - Guarani-Ñandeva	Diverse	Healthy volunteers
CYP2C8	21977947	2012	Vargens et al	Native American - Guarani-M`byá	Diverse	Healthy volunteers
CYP2C8	21173785	2012	Suarez-Kurtz et al	Diverse	Diverse	Healthy volunteers
CYP2C8	28740425	2017	Calvo et al.	Not informed	Southwest	Healthy volunteers
CYP2C8	29713005	2018	Rodrigues-Soares et al.	Diverse	South	Healthy volunteers
CYP2C8	29713005	2018	Rodrigues-Soares et al.	Diverse	Southwest	Healthy volunteers
CYP2C8	29713005	2018	Rodrigues-Soares et al.	Diverse	Northeast	Healthy volunteers
CYP2C9	21320153	2011	Botton et al	White	South	Cardiology and Vascular Diseases
CYP2C9	24224579	2014	Botton et al	White	South	Diverse
CYP2C9	24224579	2014	Botton et al	Not informed	South	Diverse
CYP2C9	25312789	2014	de Oliveira Almeida et al	not informed	Southwest	Cardiology and Vascular Diseases
CYP2C9	19387626	2009	Fuchshuber-Moraes et al	White	Southwest	Cardiology and Vascular Diseases
CYP2C9	19387626	2009	Fuchshuber-Moraes et al	Mixed	Southwest	Cardiology and Vascular Diseases
CYP2C9	19387626	2009	Fuchshuber-Moraes et al	Black	Southwest	Cardiology and Vascular Diseases
CYP2C9	25940755	2015	Lanchote et al	Mixed	Northeast	Infections and Infectious Diseases
CYP2C9	25940755	2015	Lanchote et al	Black	Northeast	Infections and Infectious Diseases
CYP2C9	25940755	2015	Lanchote et al	White	Northeast	Infections and Infectious Diseases
CYP2C9	17955230	2008	Lima et al	not informed	Southwest	Cardiology and Vascular Diseases
CYP2C9	17955230	2008	Lima et al	not informed	Southwest	Controls
CYP2C9	20615525	2010	Orsi et al	White	Southwest	Cardiology and Vascular Diseases
CYP2C9	20615525	2010	Orsi et al	Black	Southwest	Cardiology and Vascular Diseases
CYP2C9	20615525	2010	Orsi et al	Native	Southwest	Cardiology and Vascular Diseases
CYP2C9	20615525	2010	Orsi et al	Mixed	Southwest	Cardiology and Vascular Diseases
CYP2C9	18754001	2008	Perini et al	White	Southwest	Cardiology and Vascular Diseases
CYP2C9	18754001	2008	Perini et al	Mixed	Southwest	Cardiology and Vascular Diseases
CYP2C9	18754001	2008	Perini et al	Black	Southwest	Cardiology and Vascular Diseases
CYP2C9	22990331	2013	Santos et al	White	Southwest	Cardiology and Vascular Diseases
CYP2C9	22990331	2013	Santos et al	Mixed	Southwest	Cardiology and Vascular Diseases
CYP2C9	22990331	2013	Santos et al	Black	Southwest	Cardiology and Vascular Diseases
CYP2C9	24684642	2014	Santos et al	White	Southwest	Cardiology and Vascular Diseases
CYP2C9	24684642	2014	Santos et al	Mixed	Southwest	Cardiology and Vascular Diseases
CYP2C9	24684642	2014	Santos et al	Black	Southwest	Cardiology and Vascular Diseases
CYP2C9	24684642	2014	Santos et al	not informed	Southwest	Cardiology and Vascular Diseases
CYP2C9	26050796	2015	Santos et al	White	Southwest	Cardiology and Vascular Diseases
CYP2C9	26050796	2015	Santos et al	Mixed	Southwest	Cardiology and Vascular Diseases
CYP2C9	26050796	2015	Santos et al	Black	Southwest	Cardiology and Vascular Diseases
CYP2C9	26050796	2015	Santos et al	not informed	Southwest	Cardiology and Vascular Diseases
CYP2C9	21537551	2011	Twardowschy et al	not informed	South	Psychiatry and Psychology
CYP2C9	23298603	2013	Twardowschy et al	not informed	South	Psychiatry and Psychology
CYP2C9	27767381	2016	Sortica et al.	Admixed	North	Infections and Infectious Diseases
CYP2C9	28083951	2017	Castro et al.	Not informed	Southwest	Psychiatry and Psychology
CYP2C9	28083951	2017	Castro et al.	Not informed	Southwest	Rheumatology
CYP2C9	28052106	2017	Silva-Alves et al.	Not informed	Southwest	Psychiatry and Psychology
CYP2C9	32052826	2020	Botton et al	Diverse	South	Cardiology and Vascular Diseases
CYP2C9	32058056	2020	Caris et al.	Not informed	Southwest	Rheumatology
CYP2C9	32058056	2020	Caris et al.	Not informed	Southwest	Controls
CYP2C9	31395958	2019	Mourão et al.	Not informed	Southwest	Cardiology and Vascular Diseases
CYP2C9	26050796	2015	Lima Santos et al.	Diverse	Southwest	Cardiology and Vascular Diseases
CYP2C9	31447576	2019	Silveira et al.	Diverse	Northeast	Cardiology and Vascular Diseases
CYP2C9	26418418	2015	Tanno et al.	Diverse	Southwest	Controls
CYP2C9	26418418	2015	Tanno et al.	Diverse	Southwest	Pharmacology and Toxicology
CYP2C9	32298597	2020	Trujillo-Paolilo et al	White	Southwest	Oncology
CYP2C9	32298597	2020	Trujillo-Paolilo et al	Mixed	Southwest	Oncology
CYP2C9	32298597	2020	Trujillo-Paolilo et al	Black	Southwest	Oncology
CYP2C9	31539757	2019	De Marchi et al.	Not informed	Southwest	Oncology
CYP2C9	19882083	2009	Perini et al	Yellow	South	Healthy volunteers
CYP2C9	22808915	2012	Soares et al	White	Diverse	Healthy volunteers
CYP2C9	22808915	2012	Soares et al	Mixed	Diverse	Healthy volunteers
CYP2C9	22808915	2012	Soares et al	Black	Diverse	Healthy volunteers
CYP2C9	22808915	2012	Soares et al	Native Tupinikins	Southwest	Healthy volunteers
CYP2C9	22808915	2012	Soares et al	Native Guaranis	Southwest	Healthy volunteers
CYP2C9	15229460	2004	Vianna-Jorge et al	White	Southwest	Healthy volunteers
CYP2C9	15229460	2004	Vianna-Jorge et al	Mixed	Southwest	Healthy volunteers
CYP2C9	15229460	2004	Vianna-Jorge et al	Black	Southwest	Healthy volunteers
CYP2C9	21977947	2012	Vargens et al	Native Guarani-Kaiowá	Diverse	Healthy volunteers
CYP2C9	21977947	2012	Vargens et al	Native Guarani-Ñandeva	Diverse	Healthy volunteers
CYP2C9	21977947	2012	Vargens et al	Native Guarani-M`byá	Diverse	Healthy volunteers
CYP2C9	16198655	2005	Perini et al	White	Southwest	Healthy volunteers
CYP2C9	16198655	2005	Perini et al	Mixed	Southwest	Healthy volunteers
CYP2C9	16198655	2005	Perini et al	Black	Southwest	Healthy volunteers
CYP2C9	21173785	2012b	Suarez-Kurtz et al	Diverse	Diverse	Healthy volunteers
CYP2C9	25117329	2014	Liboredo et al	not informed	Southwest	Healthy volunteers
CYP2C9	30183544	2018	Naranjo et al.	Mixed	Southwest	Healthy volunteers
CYP2C9	28740425	2017	Calvo et al.	Not informed	Southwest	Healthy volunteers
CYP2C9	31442620	2019	Cusinato et al.	Diverse	Southwest	Healthy volunteers
CYP2C9	28263279	2017	Suarez-Kurtz, Struchiner	White	Southwest	Healthy volunteers
CYP2C9	28263279	2017	Suarez-Kurtz, Struchiner	Black	Southwest	Healthy volunteers
CYP2C9	29713005	2018	Rodrigues-Soares et al.	Diverse	South	Healthy volunteers
CYP2C9	29713005	2018	Rodrigues-Soares et al.	Diverse	Southwest	Healthy volunteers
CYP2C9	29713005	2018	Rodrigues-Soares et al.	Diverse	Northeast	Healthy volunteers
CYP2C9	30445356	2019	Cusinato et al.	White	Southwest	Healthy volunteers
CYP2C19	25940755	2015	Lanchote et al	Mixed	Northeast	Infections and Infectious Diseases
CYP2C19	25940755	2015	Lanchote et al	Black	Northeast	Infections and Infectious Diseases
CYP2C19	25940755	2015	Lanchote et al	White	Northeast	Infections and Infectious Diseases
CYP2C19	25403437	2015	Christofolini et al	not informed	Southwest	Obstetrics and Gynecology
CYP2C19	25403437	2015	Christofolini et al	not informed	Southwest	Controls
CYP2C19	29102810	2017	Cardoso et al.	Not informed	Southwest	Controls
CYP2C19	29102810	2017	Cardoso et al.	Not informed	Southwest	Obstetrics and Gynecology
CYP2C19	28052106	2017	Silva-Alves et al.	Not informed	Southwest	Psychiatry and Psychology
CYP2C19	26418418	2015	Tanno et al.	Diverse	Southwest	Controls
CYP2C19	26418418	2015	Tanno et al.	Diverse	Southwest	Pharmacology and Toxicology
CYP2C19	31124417	2019	Costa et al.	Not informed	Diverse	Infections and Infectious Diseases
CYP2C19	26298540	2015	Van der Bilt et al.	Not informed	Southwest	Controls
CYP2C19	26298540	2015	Van der Bilt et al.	Not informed	Southwest	Psychiatry and Psychology
CYP2C19	32103962	2020	Rodrigues-Silva et al	Mixed	Center west	Controls
CYP2C19	32103962	2020	Rodrigues-Silva et al	Mixed	Center west	Psychiatry and Psychology
CYP2C19	27706745	2016	Nabinger et al.	Diverse	South	Gastroenterology
CYP2C19	27862978	2017	Luchessi et al.	Not informed	Southwest	Cardiology and Vascular Diseases
CYP2C19	32509985	2020	Brito, Ghedini	Not informed	Center west	Controls
CYP2C19	32509985	2020	Brito, Ghedini	Not informed	Center west	Psychiatry and Psychology
CYP2C19	31539757	2019	De Marchi et al.	Not informed	Southwest	Oncology
CYP2C19	29358861	2017	Cavalcante et al.	Admixed	North	Oncology
CYP2C19	29358861	2017	Cavalcante et al.	Admixed	North	Controls
CYP2C19	29358861	2017	Cavalcante et al.	Admixed	North	Oncology
CYP2C19	24443221	2014	Kohlrausch et al	Black	South	Healthy volunteers
CYP2C19	24443221	2014	Kohlrausch et al	White	South	Healthy volunteers
CYP2C19	19882083	2009	Perini et al	Yellow	South	Healthy volunteers
CYP2C19	22344845	2012	Cassiano et al	not informed	Southwest	Healthy volunteers
CYP2C19	18581106	2008	Rocha et al	White	Southwest	Healthy volunteers
CYP2C19	21247447	2011	Santos et al	White	Diverse	Healthy volunteers
CYP2C19	21247447	2011	Santos et al	Mixed	Diverse	Healthy volunteers
CYP2C19	21247447	2011	Santos et al	Black	Diverse	Healthy volunteers
CYP2C19	14643507	2003	Cass et al	not informed	Southwest	Healthy volunteers
CYP2C19	20642546	2010	Rocha et al	not informed	Southwest	Healthy volunteers
CYP2C19	21247447	2011	Santos et al	Native Guarani	Southwest	Healthy volunteers
CYP2C19	21247447	2011	Santos et al	Native Tupinikin	Southwest	Healthy volunteers
CYP2C19	21977947	2012	Vargens et al	Native Guarani-Kaiowá	Diverse	Healthy volunteers
CYP2C19	21977947	2012	Vargens et al	Native Guarani-Ñandeva	Diverse	Healthy volunteers
CYP2C19	21977947	2012	Vargens et al	Native Guarani-M`byá	Diverse	Healthy volunteers
CYP2C19	21173785	2012b	Suarez-Kurtz et al	Diverse	Diverse	Healthy volunteers
CYP2C19	31442620	2019	Cusinato et al.	Diverse	Southwest	Healthy volunteers
CYP2C19	30183544	2018	Naranjo et al.	Mixed	Southwest	Healthy volunteers
CYP2C19	29713005	2018	Rodrigues-Soares et al.	Diverse	South	Healthy volunteers
CYP2C19	29713005	2018	Rodrigues-Soares et al.	Diverse	Southwest	Healthy volunteers
CYP2C19	29713005	2018	Rodrigues-Soares et al.	Diverse	Northeast	Healthy volunteers
CYP2C19	32174823	2020	Coelho et al.	Not informed	Southwest	Healthy volunteers
CYP2C19	30445356	2019	Cusinato et al.	White	Southwest	Healthy volunteers
CYP2D6	22777153	2012	Antunes et al	White	South	Oncology
CYP2D6	22777153	2012	Antunes et al	Not informed	South	Oncology
CYP2D6	25893704	2015	Antunes et al	White	South	Oncology
CYP2D6	25893704	2015	Antunes et al	Not informed	South	Oncology
CYP2D6	19761369	2009	Kohlrausch et al	White	South	Psychiatry and Psychology
CYP2D6	19761369	2009	Kohlrausch et al	White	South	Controls
CYP2D6	19761369	2009	Kohlrausch et al	Black	South	Controls
CYP2D6	25296365	2014	Martins et al	White	Northeast	Oncology
CYP2D6	25296365	2014	Martins et al	Mixed	Northeast	Oncology
CYP2D6	25296365	2014	Martins et al	Black	Northeast	Oncology
CYP2D6	19330589	2009	da Silva Silveira et al	White	Southwest	Diverse
CYP2D6	19330589	2009	da Silva Silveira et al	Mixed	Southwest	Diverse
CYP2D6	19330589	2009	da Silva Silveira et al	Black	Southwest	Diverse
CYP2D6	18618215	2008	Torresan et al	White	South	Oncology
CYP2D6	18618215	2008	Torresan et al	White	South	Controls
CYP2D6	10423287	1999	Cerqueira et al	Not informed	Southwest	Cardiology and Vascular Diseases
CYP2D6	16291718	2005	Cerqueira et al	White	Southwest	Cardiology and Vascular Diseases
CYP2D6	29390987	2018	Brasil et al.	Not Informed	North	Infections and Infectious Diseases
CYP2D6	31547827	2019	Daher et al.	Not informed	Diverse	Infections and Infectious Diseases
CYP2D6	26298540	2015	Van der Bilt et al.	Not informed	Southwest	Controls
CYP2D6	26298540	2015	Van der Bilt et al.	Not informed	Southwest	Psychiatry and Psychology
CYP2D6	26682995	2015	dos Santos Júnior et al.	Yellow	Southwest	Psychiatry and Psychology
CYP2D6	26682995	2015	dos Santos Júnior et al.	White	Southwest	Psychiatry and Psychology
CYP2D6	26682995	2015	dos Santos Júnior et al.	Black	Southwest	Psychiatry and Psychology
CYP2D6	26682995	2015	dos Santos Júnior et al.	Mixed	Southwest	Psychiatry and Psychology
CYP2D6	26682995	2015	dos Santos Júnior et al.	Yellow	Southwest	Controls
CYP2D6	26682995	2015	dos Santos Júnior et al.	White	Southwest	Controls
CYP2D6	26682995	2015	dos Santos Júnior et al.	Black	Southwest	Controls
CYP2D6	26682995	2015	dos Santos Júnior et al.	Mixed	Southwest	Controls
CYP2D6	28052106	2017	Silva-Alves et al.	Not informed	Southwest	Psychiatry and Psychology
CYP2D6	27882219	2016	Melo et al.	Not informed	Northeast	Oncology
CYP2D6	26331791	2015	Godoy et al.	Not informed	Southwest	Dermatology
CYP2D6	26331791	2015	Godoy et al.	Not informed	Southwest	Controls
CYP2D6	31573754	2020	Nardin et al.	Not informed	Southwest	Oncology
CYP2D6	29389962	2016	Silvino et al.	Not informed	Center west	Infections and Infectious Diseases
CYP2D6	32122891	2020	Silvino et al.	Not informed	North	Infections and Infectious Diseases
CYP2D6	31758654	2020	Ximenez et al.	Not informed	Southwest	Oncology
CYP2D6	31539757	2019	De Marchi et al.	Not informed	Southwest	Oncology
CYP2D6	21637445	2009	Maciel et al	Black	South	Healthy volunteers
CYP2D6	21637445	2009	Maciel et al	White	South	Healthy volunteers
CYP2D6	25419701	2014	Bonifaz-Peña et al	White	Southwest	Healthy volunteers
CYP2D6	25419701	2014	Bonifaz-Peña et al	Mixed	Southwest	Healthy volunteers
CYP2D6	25419701	2014	Bonifaz-Peña et al	Black	Southwest	Healthy volunteers
CYP2D6	20642546	2010	Rocha et al	not informed	Southwest	Healthy volunteers
CYP2D6	25329392	2014	Friedrich et al	White	North	Healthy volunteers
CYP2D6	25329392	2014	Friedrich et al	Mixed	North	Healthy volunteers
CYP2D6	25329392	2014	Friedrich et al	Black	North	Healthy volunteers
CYP2D6	25329392	2014	Friedrich et al	White	Northeast	Healthy volunteers
CYP2D6	25329392	2014	Friedrich et al	Mixed	Northeast	Healthy volunteers
CYP2D6	25329392	2014	Friedrich et al	Black	Northeast	Healthy volunteers
CYP2D6	25329392	2014	Friedrich et al	White	Southwest	Healthy volunteers
CYP2D6	25329392	2014	Friedrich et al	Mixed	Southwest	Healthy volunteers
CYP2D6	25329392	2014	Friedrich et al	Black	Southwest	Healthy volunteers
CYP2D6	25329392	2014	Friedrich et al	White	South	Healthy volunteers
CYP2D6	25329392	2014	Friedrich et al	Mixed	South	Healthy volunteers
CYP2D6	25329392	2014	Friedrich et al	Black	South	Healthy volunteers
CYP2D6	31442620	2019	Cusinato et al.	Diverse	Southwest	Healthy volunteers
CYP2D6	30183544	2018	Naranjo et al.	Mixed	Southwest	Healthy volunteers
CYP2D6	32174823	2020	Coelho et al.	Not informed	Southwest	Healthy volunteers
CYP2D6	30445356	2019	Cusinato et al.	White	Southwest	Healthy volunteers
CYP2E1	20093049	2011	Bazo et al	Not informed	Southwest	Cardiology and Vascular Diseases
CYP2E1	20093049	2011	Bazo et al	Not informed	Southwest	Controls
CYP2E1	15215328	2004	Burim et al	Diverse	Southwest	Diverse
CYP2E1	15215328	2004	Burim et al	Diverse	Southwest	Diverse
CYP2E1	15215328	2004	Burim et al	Diverse	Southwest	Psychiatry and Psychology
CYP2E1	15215328	2004	Burim et al	White	Southwest	Controls
CYP2E1	15215328	2004	Burim et al	Black	Southwest	Controls
CYP2E1	15215328	2004	Burim et al	Mixed	Southwest	Controls
CYP2E1	14991750	2004	Canalle et al	White	Southwest	Oncology
CYP2E1	14991750	2004	Canalle et al	Black	Southwest	Oncology
CYP2E1	14991750	2004	Canalle et al	Mixed	Southwest	Oncology
CYP2E1	14991750	2004	Canalle et al	White	Southwest	Controls
CYP2E1	14991750	2004	Canalle et al	Black	Southwest	Controls
CYP2E1	14991750	2004	Canalle et al	Mixed	Southwest	Controls
CYP2E1	15112335	2004	Colombo et al	White	Southwest	Oncology
CYP2E1	15112335	2004	Colombo et al	Black	Southwest	Oncology
CYP2E1	15112335	2004	Colombo et al	White	Southwest	Gastroenterology
CYP2E1	15112335	2004	Colombo et al	Black	Southwest	Gastroenterology
CYP2E1	15112335	2004	Colombo et al	White	Southwest	Controls
CYP2E1	15112335	2004	Colombo et al	Black	Southwest	Controls
CYP2E1	22788240	2012	Costa et al	Mixed	Northeast	Infections and Infectious Diseases
CYP2E1	22788240	2012	Costa et al	Not informed	Northeast	Infections and Infectious Diseases
CYP2E1	21590276	2012	Cury et al	Not informed	Southwest	Oncology
CYP2E1	21590276	2012	Cury et al	Not informed	Southwest	Controls
CYP2E1	18507060	2008	Duarte et al	Not informed	Southwest	Dental and Oral Health
CYP2E1	18507060	2008	Duarte et al	Not informed	Southwest	Controls
CYP2E1	23099118	2013	Forestiero et al	White	Diverse	Infections and Infectious Diseases
CYP2E1	23099118	2013	Forestiero et al	Black	Diverse	Infections and Infectious Diseases
CYP2E1	23099118	2013	Forestiero et al	White	Diverse	Controls
CYP2E1	23099118	2013	Forestiero et al	Black	Diverse	Controls
CYP2E1	19887496	2010	Garcia et al	White	Southwest	Oncology
CYP2E1	19887496	2010	Garcia et al	Mixed	Southwest	Oncology
CYP2E1	19887496	2010	Garcia et al	Black	Southwest	Oncology
CYP2E1	19887496	2010	Garcia et al	White	Southwest	Controls
CYP2E1	19887496	2010	Garcia et al	Mixed	Southwest	Controls
CYP2E1	19887496	2010	Garcia et al	White	Southwest	Controls
CYP2E1	16721740	2006	Gattás et al	White	Southwest	Oncology
CYP2E1	16721740	2006	Gattás et al	Not informed	Southwest	Oncology
CYP2E1	16721740	2006	Gattás et al	White	Southwest	Controls
CYP2E1	16721740	2006	Gattás et al	Not informed	Southwest	Controls
CYP2E1	24981927	2014	Glesse et al	White	South	Rheumatology
CYP2E1	24981927	2014	Glesse et al	Black	South	Rheumatology
CYP2E1	7534543	1995	Hamada et al	White	Southwest	Oncology
CYP2E1	7534543	1995	Hamada et al	Mixed	Southwest	Oncology
CYP2E1	7534543	1995	Hamada et al	Black	Southwest	Oncology
CYP2E1	7534543	1995	Hamada et al	White	Southwest	Controls
CYP2E1	7534543	1995	Hamada et al	Mixed	Southwest	Controls
CYP2E1	7534543	1995	Hamada et al	Black	Southwest	Controls
CYP2E1	16488179	2006	Marques et al	White	Southwest	Oncology
CYP2E1	16488179	2006	Marques et al	Mixed	Southwest	Oncology
CYP2E1	16488179	2006	Marques et al	Black	Southwest	Oncology
CYP2E1	16488179	2006	Marques et al	White	Southwest	Controls
CYP2E1	16488179	2006	Marques et al	Mixed	Southwest	Controls
CYP2E1	16488179	2006	Marques et al	Black	Southwest	Controls
CYP2E1	10919737	2000	Nishimoto et al	Yellow	Southwest	Oncology
CYP2E1	10919737	2000	Nishimoto et al	Not informed	Southwest	Oncology
CYP2E1	10919737	2000	Nishimoto et al	Yellow	Southwest	Controls
CYP2E1	10919737	2000	Nishimoto et al	Not informed	Southwest	Controls
CYP2E1	19442564	2009	Olivieri et al	Diverse	Southwest	Oncology
CYP2E1	19442564	2009	Olivieri et al	Not informed	Southwest	Controls
CYP2E1	17916905	2007	Rossini et al	White	Southwest	Oncology
CYP2E1	17916905	2007	Rossini et al	Diverse	Southwest	Oncology
CYP2E1	17916905	2007	Rossini et al	White	Southwest	Controls
CYP2E1	17916905	2007	Rossini et al	Diverse	Southwest	Controls
CYP2E1	23394127	2013	Santos et al	Admixed	North	Infections and Infectious Diseases
CYP2E1	7581485	1995	Sugimura et al	White	Southwest	Oncology
CYP2E1	7581485	1995	Sugimura et al	Mixed	Southwest	Oncology
CYP2E1	7581485	1995	Sugimura et al	Black	Southwest	Oncology
CYP2E1	7581485	1995	Sugimura et al	White	Southwest	Controls
CYP2E1	7581485	1995	Sugimura et al	Mixed	Southwest	Controls
CYP2E1	7581485	1995	Sugimura et al	Black	Southwest	Controls
CYP2E1	22012226	2011	Teixeira et al	Not informed	Southwest	Infections and Infectious Diseases
CYP2E1	24793319	2014	Zaverucha-do-Valle et al	White	Southwest	Infections and Infectious Diseases
CYP2E1	24793319	2014	Zaverucha-do-Valle et al	Not informed	Southwest	Infections and Infectious Diseases
CYP2E1	28018104	2016	Fernandes et al.	Not informed	Southwest	Controls
CYP2E1	28018104	2016	Fernandes et al.	Not informed	Southwest	Oncology
CYP2E1	27865386	2016	Heinrich et al.	Native	Center west	Infections and Infectious Diseases
CYP2E1	27865386	2016	Heinrich et al.	Not informed	Center west	Infections and Infectious Diseases
CYP2E1	28524801	2017	Cilião et al.	White	South	Nephrology
CYP2E1	28524801	2017	Cilião et al.	Black	South	Nephrology
CYP2E1	28524801	2017	Cilião et al.	Yellow	South	Nephrology
CYP2E1	29358861	2017	Cavalcante et al.	Admixed	North	Oncology
CYP2E1	29358861	2017	Cavalcante et al.	Admixed	North	Controls
CYP2E1	29358861	2017	Cavalcante et al.	Admixed	North	Oncology
CYP2E1	27916141	2016	Ramos et al.	Not informed	Center west	Psychiatry and Psychology
CYP2E1	27916141	2016	Ramos et al.	Not informed	Center west	Controls
CYP2E1	29940492	2018	Ramos et al.	Not informed	Center west	Psychiatry and Psychology
CYP2E1	29940492	2018	Ramos et al.	Not informed	Center west	Controls
CYP2E1	31697922	2019	Santos et al.	Not informed	Southwest	Infections and Infectious Diseases
CYP2E1	28052106	2017	Silva-Alves et al.	Not informed	Southwest	Psychiatry and Psychology
CYP2E1	29619129	2018	Yahouédéhou et al	Not informed	Northeast	Hematology
CYP2E1	29619129	2018	Yahouédéhou et al	Not informed	Northeast	Hematology
CYP2E1	12365037	2002	Gaspar et al	Native Xavante	Center west	Healthy volunteers
CYP2E1	12365037	2002	Gaspar et al	Native Guarani	Center west	Healthy volunteers
CYP2E1	12365037	2002	Gaspar et al	Native Wai Wai	North	Healthy volunteers
CYP2E1	12365037	2002	Gaspar et al	Native Zoró	Center west	Healthy volunteers
CYP2E1	12365037	2002	Gaspar et al	Native Surui	Center west	Healthy volunteers
CYP2E1	12365037	2002	Gaspar et al	Native Gavião	Center west	Healthy volunteers
CYP2E1	21637445	2009	Maciel et al	Black	South	Healthy volunteers
CYP2E1	21637445	2009	Maciel et al	White	South	Healthy volunteers
CYP2E1	11198676	2000	Gattás et al	White	Southwest	Healthy volunteers
CYP2E1	11198676	2000	Gattás et al	Mixed	Southwest	Healthy volunteers
CYP2E1	16470306	2006	Rossini et al	White	Southwest	Healthy volunteers
CYP2E1	16470306	2006	Rossini et al	Mixed	Southwest	Healthy volunteers
CYP2E1	16470306	2006	Rossini et al	Black	Southwest	Healthy volunteers
CYP2E1	17292523	2007	Heuser et al	Not informed	South	Healthy volunteers
CYP2E1	18550589	2008	da Silva J et al	Not informed	South	Healthy volunteers
CYP2E1	26197327	2015	Mitri et al	Not informed	Southwest	Healthy volunteers
CYP2E1	31411285	2019	Barata Silva et al.	Not informed	Southwest	Healthy volunteers
CYP2E1	30154939	2018	de Oliveira et al.	Black	Northeast	Healthy volunteers
CYP2E1	31292876	2019	Godoy et al.	Not informed	Center west	Healthy volunteers
CYP2E1	26197327	2015	Mitri et al.	White	Southwest	Healthy volunteers
CYP2E1	26197327	2015	Mitri et al.	Black	Southwest	Healthy volunteers
CYP2E1	26197327	2015	Mitri et al.	Mixed	Southwest	Healthy volunteers
CYP2E1	26197327	2015	Mitri et al.	Yellow	Southwest	Healthy volunteers
CYP2E1	26197327	2015	Mitri et al.	Native	Southwest	Healthy volunteers
CYP2E1	29713005	2018	Rodrigues-Soares et al.	Diverse	South	Healthy volunteers
CYP2E1	29713005	2018	Rodrigues-Soares et al.	Diverse	Southwest	Healthy volunteers
CYP2E1	29713005	2018	Rodrigues-Soares et al.	Diverse	Northeast	Healthy volunteers
CYP3A4	25853922	2015	Antunes et al	Not informed	South	Oncology
CYP3A4	25893704	2015	Antunes et al	White	South	Oncology
CYP3A4	25893704	2015	Antunes et al	Not informed	South	Oncology
CYP3A4	24224579	2014	Botton et al	White	South	Diverse
CYP3A4	24224579	2014	Botton et al	Not informed	South	Diverse
CYP3A4	21964586	2012	Jeovanio-Silva et al	White	Southwest	Infections and Infectious Diseases
CYP3A4	21964586	2012	Jeovanio-Silva et al	Not informed	Southwest	Infections and Infectious Diseases
CYP3A4	18551040	2008	Kohlrausch et al	White	South	Psychiatry and Psychology
CYP3A4	25940755	2015	Lanchote et al	Mixed	Northeast	Infections and Infectious Diseases
CYP3A4	25940755	2015	Lanchote et al	Black	Northeast	Infections and Infectious Diseases
CYP3A4	25940755	2015	Lanchote et al	White	Northeast	Infections and Infectious Diseases
CYP3A4	15475069	2004	Lopes et al	Not informed	Southwest	Oncology
CYP3A4	25992585	2015	Lopes et al	White	Southwest	Oncology
CYP3A4	25992585	2015	Lopes et al	Diverse	Southwest	Oncology
CYP3A4	25992585	2015	Lopes et al	White	Southwest	Controls
CYP3A4	25992585	2015	Lopes et al	Diverse	Southwest	Controls
CYP3A4	25150625	2015	Pombo-de-Oliveira MS et al	White	South	Oncology
CYP3A4	25150625	2015	Pombo-de-Oliveira MS et al	White	South	Oncology
CYP3A4	20884258	2011	Rodrigues et al	White	South	Oncology
CYP3A4	20884258	2011	Rodrigues et al	White	South	Controls
CYP3A4	18331564	2008	Sprinz et al	Not informed	South	Infections and Infectious Diseases
CYP3A4	24793319	2014	Zaverucha-do-Valle et al	White	Southwest	Infections and Infectious Diseases
CYP3A4	24793319	2014	Zaverucha-do-Valle et al	Not informed	Southwest	Infections and Infectious Diseases
CYP3A4	27767381	2016	Sortica et al.	Admixed	North	Infections and Infectious Diseases
CYP3A4	26331791	2015	Godoy et al.	Not informed	Southwest	Dermatology
CYP3A4	26331791	2015	Godoy et al.	Not informed	Southwest	Controls
CYP3A4	26947771	2015	de Moraes et al	Not informed	Southwest	Psychiatry and Psychology
CYP3A4	27434656	2016	Gengivir et al.	White	Southwest	Nephrology
CYP3A4	27434656	2016	Gengivir et al.	Mixed	Southwest	Nephrology
CYP3A4	27434656	2016	Gengivir et al.	Black	Southwest	Nephrology
CYP3A4	27434656	2016	Gengivir et al.	Not informed	Southwest	Nephrology
CYP3A4	28052106	2017	Silva-Alves et al	Not informed	Southwest	Psychiatry and Psychology
CYP3A4	28524801	2017	Cilião et al.	White	South	Nephrology
CYP3A4	28524801	2017	Cilião et al.	Black	South	Nephrology
CYP3A4	28524801	2017	Cilião et al.	Yellow	South	Nephrology
CYP3A4	27767381	2016	Sortica et al.	Admixed	North	Infections and Infectious Diseases
CYP3A4	29868865	2018	Almeida et al	Admixed	Southwest	Infections and Infectious Diseases
CYP3A4	30336495	2018	Veiga et al	Not Informed	Southwest	Oncology
CYP3A4	30336495	2018	Veiga et al	Not Informed	Southwest	Controls
CYP3A4	30392849	2018	Coelho et al	Admixed	Northeast	Infections and Infectious Diseases
CYP3A4	31849280	2020	Gengivir et al.	White	Southwest	Nephrology
CYP3A4	31849280	2020	Gengivir et al.	Black	Southwest	Nephrology
CYP3A4	31849280	2020	Gengivir et al.	Mixed	Southwest	Nephrology
CYP3A4	31849280	2020	Gengivir et al.	Not informed	Southwest	Nephrology
CYP3A4	32103962	2020	Rodrigues-Silva et al	Not Informed	Center west	Psychiatry and Psychology
CYP3A4	32103962	2020	Rodrigues-Silva et al	Not Informed	Center west	Healthy volunteers
CYP3A4	32366712	2020	Almeida et al	Not informed	North	Infections and Infectious Diseases
CYP3A4	32366712	2020	Almeida et al	Not informed	North	Infections and Infectious Diseases
CYP3A4	32486903	2020	Kim et al	White	Southwest	Infections and Infectious Diseases
CYP3A4	32486903	2020	Kim et al	Black	Southwest	Infections and Infectious Diseases
CYP3A4	32486903	2020	Kim et al	Mixed	Southwest	Infections and Infectious Diseases
CYP3A4	32486903	2020	Kim et al	Yellow	Southwest	Infections and Infectious Diseases
CYP3A4	24443221	2014	Kohlrausch et al	Black	South	Healthy volunteers
CYP3A4	24443221	2014	Kohlrausch et al	White	South	Healthy volunteers
CYP3A4	18581106	2008	Rocha et al	White	Southwest	Healthy volunteers
CYP3A4	26909985	2016	Monteiro	Not informed	Not informed	Healthy volunteers
CYP3A4	16130011	2005	Almeida et al	White	South	Healthy volunteers
CYP3A4	16321621	2005	Fiegenbaum et al	White	South	Healthy volunteers
CYP3A4	23501331	2013	Willrich et al	White	Southwest	Healthy volunteers
CYP3A4	23501331	2013	Willrich et al	Not informed	Southwest	Healthy volunteers
CYP3A4	31442620	2019	Cusinato et al.	Diverse	Southwest	Healthy volunteers
CYP3A4	32103962	2020	Rodrigues-Silva et al	Not Informed	Center west	Healthy volunteers
CYP3A4	29713005	2018	Rodrigues-Soares et al.	Diverse	South	Healthy volunteers
CYP3A4	29713005	2018	Rodrigues-Soares et al.	Diverse	Southwest	Healthy volunteers
CYP3A4	29713005	2018	Rodrigues-Soares et al.	Diverse	Northeast	Healthy volunteers
CYP3A5	24224579	2014	Botton et al	White	South	Diverse
CYP3A5	24224579	2014	Botton et al	Not informed	South	Diverse
CYP3A5	24528196	2014	Cusinato et al	Not informed	Southwest	Nephrology
CYP3A5	18288082	2008	Estrela et al	White	Southwest	Infections and Infectious Diseases
CYP3A5	18288082	2008	Estrela et al	Mixed	Southwest	Infections and Infectious Diseases
CYP3A5	18288082	2008	Estrela et al	Black	Southwest	Infections and Infectious Diseases
CYP3A5	18288082	2008	Estrela et al	Native	Southwest	Infections and Infectious Diseases
CYP3A5	25271170	2015	Fernandes et al	Admixed	North	Infections and Infectious Diseases
CYP3A5	18551040	2008	Kohlrausch et al	White	South	Psychiatry and Psychology
CYP3A5	25992585	2015	Lopes et al	White	Southwest	Oncology
CYP3A5	25992585	2015	Lopes et al	Diverse	Southwest	Oncology
CYP3A5	25992585	2015	Lopes et al	White	Southwest	Controls
CYP3A5	25992585	2015	Lopes et al	Diverse	Southwest	Controls
CYP3A5	25150625	2015	Pombo-de-Oliveira MS et al	White	South	Oncology
CYP3A5	25150625	2015	Pombo-de-Oliveira MS et al	White	South	Oncology
CYP3A5	21806386	2011	Santoro et al	White	Southwest	Nephrology
CYP3A5	21806386	2011	Santoro et al	Mixed	Southwest	Nephrology
CYP3A5	21806386	2011	Santoro et al	Black	Southwest	Nephrology
CYP3A5	21806386	2011	Santoro et al	Yellow	Southwest	Nephrology
CYP3A5	19229255	2009	Shimada et al	Not informed	Southwest	Oncology
CYP3A5	19229255	2009	Shimada et al	Not informed	Southwest	Controls
CYP3A5	19229255	2009	Shimada et al	Yellow	Southwest	Oncology
CYP3A5	19229255	2009	Shimada et al	Yellow	Southwest	Controls
CYP3A5	22215203	2012	Silveira et al	White	Southwest	Oncology
CYP3A5	22215203	2012	Silveira et al	Mixed	Southwest	Oncology
CYP3A5	22215203	2012	Silveira et al	Black	Southwest	Oncology
CYP3A5	22215203	2012	Silveira et al	White	Southwest	Controls
CYP3A5	22215203	2012	Silveira et al	Mulatto	Southwest	Controls
CYP3A5	22215203	2012	Silveira et al	Mixed	Southwest	Controls
CYP3A5	18331564	2008	Sprinz et al	Not informed	South	Infections and Infectious Diseases
CYP3A5	31056713	2019	Paula et al.	Not informed	Southwest	Oncology
CYP3A5	27767381	2016	Sortica et al.	Admixed	North	Infections and Infectious Diseases
CYP3A5	32298597	2020	Trujillo-Paolilo et al	White	Southwest	Oncology
CYP3A5	32298597	2020	Trujillo-Paolilo et al	Mixed	Southwest	Oncology
CYP3A5	32298597	2020	Trujillo-Paolilo et al	Black	Southwest	Oncology
CYP3A5	26418418	2015	Tanno et al.	Diverse	Southwest	Controls
CYP3A5	26418418	2015	Tanno et al.	Diverse	Southwest	Pharmacology and Toxicology
CYP3A5	26331791	2015	Godoy et al.	Not informed	Southwest	Dermatology
CYP3A5	26331791	2015	Godoy et al.	Not informed	Southwest	Controls
CYP3A5	26909985	2016	Monteiro	Not informed	North	Healthy volunteers
CYP3A5	26947771	2015	de Moraes et al	Not informed	Southwest	Diverse
CYP3A5	27434656	2016	Gengivir et al.	White	Southwest	Nephrology
CYP3A5	27434656	2016	Gengivir et al.	Mixed	Southwest	Nephrology
CYP3A5	27434656	2016	Gengivir et al.	Black	Southwest	Nephrology
CYP3A5	27434656	2016	Gengivir et al.	Not informed	Southwest	Nephrology
CYP3A5	27767381	2016	Sortica et al.	Admixed	North	Infections and Infectious Diseases
CYP3A5	28052106	2017	Silva-Alves et al	Not informed	Southwest	Psychiatry and Psychology
CYP3A5	28316087	2017	Gengivir et al.	Not informed	Southwest	Nephrology
CYP3A5	28524801	2017	Cilião et al.	White	South	Nephrology
CYP3A5	28524801	2017	Cilião et al.	Black	South	Nephrology
CYP3A5	28524801	2017	Cilião et al.	Yellow	South	Nephrology
CYP3A5	29868865	2018	Almeida et al	Admixed	Southwest	Infections and Infectious Diseases
CYP3A5	30336495	2018	Veiga et al	Not Informed	Southwest	Oncology
CYP3A5	30336495	2018	Veiga et al	Not Informed	Southwest	Controls
CYP3A5	31123858	2019	de Castro et al	not informed	Southwest	Oncology
CYP3A5	31849280	2020	Gengivir et al.	White	Southwest	Nephrology
CYP3A5	31849280	2020	Gengivir et al.	Black	Southwest	Nephrology
CYP3A5	31849280	2020	Gengivir et al.	Mixed	Southwest	Nephrology
CYP3A5	31849280	2020	Gengivir et al.	Not informed	Southwest	Nephrology
CYP3A5	32366712	2020	Almeida et al	Not informed	North	Infections and Infectious Diseases
CYP3A5	32366712	2020	Almeida et al	Not informed	North	Infections and Infectious Diseases
CYP3A5	32486903	2020	Kim et al	White	Southwest	Infections and Infectious Diseases
CYP3A5	32486903	2020	Kim et al	Black	Southwest	Infections and Infectious Diseases
CYP3A5	32486903	2020	Kim et al	Mixed	Southwest	Infections and Infectious Diseases
CYP3A5	32486903	2020	Kim et al	Yellow	Southwest	Infections and Infectious Diseases
CYP3A5	24443221	2014	Kohlrausch et al	Black	South	Healthy volunteers
CYP3A5	24443221	2014	Kohlrausch et al	White	South	Healthy volunteers
CYP3A5	17979504	2007	Suarez-Kurtz et al	White	Southwest	Healthy volunteers
CYP3A5	17979504	2007	Suarez-Kurtz et al	Mixed	Southwest	Healthy volunteers
CYP3A5	17979504	2007	Suarez-Kurtz et al	Black	Southwest	Healthy volunteers
CYP3A5	24427273	2014	Suarez-Kurtz et al	White	Northeast	Healthy volunteers
CYP3A5	24427273	2014	Suarez-Kurtz et al	Mixed	Northeast	Healthy volunteers
CYP3A5	24427273	2014	Suarez-Kurtz et al	Black	Northeast	Healthy volunteers
CYP3A5	24427273	2014	Suarez-Kurtz et al	White	North	Healthy volunteers
CYP3A5	24427273	2014	Suarez-Kurtz et al	Mixed	North	Healthy volunteers
CYP3A5	24427273	2014	Suarez-Kurtz et al	Black	North	Healthy volunteers
CYP3A5	24427273	2014	Suarez-Kurtz et al	White	Southwest	Healthy volunteers
CYP3A5	24427273	2014	Suarez-Kurtz et al	Mixed	Southwest	Healthy volunteers
CYP3A5	24427273	2014	Suarez-Kurtz et al	Black	Southwest	Healthy volunteers
CYP3A5	24427273	2014	Suarez-Kurtz et al	White	South	Healthy volunteers
CYP3A5	24427273	2014	Suarez-Kurtz et al	Mixed	South	Healthy volunteers
CYP3A5	24427273	2014	Suarez-Kurtz et al	Black	South	Healthy volunteers
CYP3A5	16321621	2005	Fiegenbaum et al	White	South	Healthy volunteers
CYP3A5	18727922	2008	Willrich et al	Not informed	Southwest	Healthy volunteers
CYP3A5	18727922	2008	Willrich et al	Black	Southwest	Healthy volunteers
CYP3A5	23501331	2013	Willrich et al	White	Southwest	Healthy volunteers
CYP3A5	23501331	2013	Willrich et al	Not informed	Southwest	Healthy volunteers
CYP3A5	29713005	2018	Rodrigues-Soares et al.	Diverse	South	Healthy volunteers
CYP3A5	29713005	2018	Rodrigues-Soares et al.	Diverse	Southwest	Healthy volunteers
CYP3A5	29713005	2018	Rodrigues-Soares et al.	Diverse	Northeast	Healthy volunteers
CYP3A5	31442620	2019	Cusinato et al.	Diverse	Southwest	Healthy volunteers
CYP3A5	29713005	2018	Rodrigues-Soares et al.	Diverse	South	Healthy volunteers
CYP3A5	29713005	2018	Rodrigues-Soares et al.	Diverse	Southwest	Healthy volunteers
CYP3A5	29713005	2018	Rodrigues-Soares et al.	Diverse	Northeast	Healthy volunteers
CYP4F2	21320153	2011	Botton et al	White	South	Cardiology and Vascular Diseases
CYP4F2	20182420	2010	Perini et al	White	Southwest	Cardiology and Vascular Diseases
CYP4F2	20182420	2010	Perini et al	Mixed	Southwest	Cardiology and Vascular Diseases
CYP4F2	20182420	2010	Perini et al	Black	Southwest	Cardiology and Vascular Diseases
CYP4F2	30051215	2018	Tavares et al.	White	Southwest	Cardiology and Vascular Diseases
CYP4F2	30051215	2018	Tavares et al.	Mixed	Southwest	Cardiology and Vascular Diseases
CYP4F2	30051215	2018	Tavares et al.	Black	Southwest	Cardiology and Vascular Diseases
Debrisoquine	16291718	2005	Cerqueira et al	White	Southwest	Cardiology and Vascular Diseases
Debrisoquine	11145052	2000	Cerqueira et al	White	Southwest	Cardiology and Vascular Diseases
Dextromethorphan	22777153	2012	Antunes et al.	White	South	Oncology
Dextromethorphan	22777153	2012	Antunes et al.	Not informed	South	Oncology
Dextromethorphan	24747158	2014	Antunes et al.	White	South	Oncology
Dextromethorphan	24747158	2014	Antunes et al.	Mixed	South	Oncology
Dextromethorphan	24747158	2014	Antunes et al.	Black	South	Oncology
Dextromethorphan	25853922	2015	Antunes et al.	White	South	Oncology
Dextromethorphan	25853922	2015	Antunes et al.	Diverse	South	Oncology
DPYD	24101147	2013	Cunha-Junior et al	White	Southwest	Oncology
DPYD	24101147	2013	Cunha-Junior et al	Not informed	Southwest	Oncology
DPYD	27399164	2016	Galarza et al.	Diverse	South	Oncology
DPYD	31641844	2019	Cunha-Junior et al.	Black	Southwest	Healthy volunteers
DPYD	31641844	2019	Cunha-Junior et al.	Black	Northeast	Healthy volunteers
DRD1	23036699	2012	Ota et al	Admixed	Southwest	Psychiatry and Psychology
DRD1	17394052	2007	da Silva Lobo et al	Not informed	Southwest	Psychiatry and Psychology
DRD1	30794329	2019	Santos et al.	Not informed	Northeast	Psychiatry and Psychology
DRD2	10898904	2000	Bau et al	White	South	Psychiatry and Psychology
DRD2	10898904	2000	Bau et al	Not informed	South	Controls
DRD2	23171335	2012	Rieck et al	White	South	Psychiatry and Psychology
DRD2	23171335	2012	Rieck et al	Not informed	South	Psychiatry and Psychology
DRD2	23260856	2013	Bilibio et al	Not informed	South	Obstetrics and Gynecology
DRD2	23260856	2013	Bilibio et al	Not informed	South	Controls
DRD2	19547807	2009	Cordeiro et al	Not informed	Southwest	Psychiatry and Psychology
DRD2	19547807	2009	Cordeiro et al	Not informed	Southwest	Controls
DRD2	25098474	2014	Cordeiro et al	Not informed	Southwest	Psychiatry and Psychology
DRD2	25098474	2014	Cordeiro et al	Not informed	Southwest	Controls
DRD2	17394052	2007	da Silva Lobo et al	Not informed	Southwest	Psychiatry and Psychology
DRD2	16032443	2006	Freire et al	White	South	Psychiatry and Psychology
DRD2	16032443	2006	Freire et al	White	South	Psychiatry and Psychology
DRD2	16032443	2006	Freire et al	White	South	Controls
DRD2	18551040	2008	Kohlrausch et al	White	South	Psychiatry and Psychology
DRD2	25989041	2015	Mota et al	White	South	Psychiatry and Psychology
DRD2	25989041	2015	Mota et al	White	South	Controls
DRD2	25684044	2015	Vasconcelos et al	White	Northeast	Psychiatry and Psychology
DRD2	25684044	2015	Vasconcelos et al	White	Northeast	Controls
DRD2	30946941	2019	Fraporti et al.	White	South	Psychiatry and Psychology
DRD2	30946941	2019	Fraporti et al.	not informed	South	Psychiatry and Psychology
DRD2	32294749	2020	Santos-Lobato et al.	Not informed	Southwest	Psychiatry and Psychology
DRD2	31144779	2019	Franco et al.	Not informed	South	Rheumatology
DRD2	31144779	2019	Franco et al.	Not informed	South	Controls
DRD2	31331851	2019	Gabardo et al.	Not informed	South	Dental and Oral Health
DRD2	31868570	2019	Scariot et al.	Not informed	Southwest	Controls
DRD2	31868570	2019	Scariot et al.	Not informed	Southwest	Dental and Oral Health
DRD2	30353564	2018	Santos et al.	Not informed	Northeast	Psychiatry and Psychology
DRD2	29791666	2018	Pinto et al.	Not informed	Southwest	Diverse
DRD2	29791666	2018	Pinto et al.	Not informed	Southwest	Psychiatry and Psychology
DRD2	30794329	2019	Santos et al.	Not informed	Northeast	Psychiatry and Psychology
DRD2	26682995	2015	dos Santos Júnior et al.	Yellow	Southwest	Psychiatry and Psychology
DRD2	26682995	2015	dos Santos Júnior et al.	White	Southwest	Psychiatry and Psychology
DRD2	26682995	2015	dos Santos Júnior et al.	Black	Southwest	Psychiatry and Psychology
DRD2	26682995	2015	dos Santos Júnior et al.	Mixed	Southwest	Psychiatry and Psychology
DRD2	26682995	2015	dos Santos Júnior et al.	Yellow	Southwest	Controls
DRD2	26682995	2015	dos Santos Júnior et al.	White	Southwest	Controls
DRD2	26682995	2015	dos Santos Júnior et al.	Black	Southwest	Controls
DRD2	26682995	2015	dos Santos Júnior et al.	Mixed	Southwest	Controls
DRD2	11534057	2000	Hutz et al	Native Suruí	Center west	Healthy volunteers
DRD2	11534057	2000	Hutz et al	Native Gavião	Center west	Healthy volunteers
DRD2	11534057	2000	Hutz et al	Native Zoró	Center west	Healthy volunteers
DRD2	11534057	2000	Hutz et al	Native Wai Wai	North	Healthy volunteers
DRD2	11534057	2000	Hutz et al	Native Xavante	Center west	Healthy volunteers
DRD2	30044466	2018	Feistauer et al.	Diverse	South	Healthy volunteers
DRD2	28534928	2017	Mariath et al.	Not informed	South	Healthy volunteers
EGF	22481252	2012	da Silveira et al	Black	Southwest	Psychiatry and Psychology
EGF	22481252	2012	da Silveira et al	Diverse	Southwest	Psychiatry and Psychology
EGF	22481252	2012	da Silveira et al	Black	Southwest	Controls
EGF	22481252	2012	da Silveira et al	Diverse	Southwest	Controls
EGF	25222228	2014	Oliveira et al	White	Southwest	Obstetrics and Gynecology
EGF	25222228	2014	Oliveira et al	Mixed	Southwest	Obstetrics and Gynecology
EGF	25222228	2014	Oliveira et al	Black	Southwest	Obstetrics and Gynecology
EGF	25222228	2014	Oliveira et al	White	Southwest	Controls
EGF	25222228	2014	Oliveira et al	Mixed	Southwest	Controls
EGF	25222228	2014	Oliveira et al	Black	Southwest	Controls
EGF	31924381	2020	Cavalcante et al	Not informed	South	Dental and Oral Health
EGF	23032210	2012	Küchler et al	Not informed	Southwest	Healthy volunteers
EGFR	18949739	2008	Barbosa et al	Not informed	Southwest	Psychiatry and Psychology
EGFR	18949739	2008	Barbosa et al	Not informed	Southwest	Controls
EGFR	20163722	2010	Bellini et al	Not informed	Southwest	Infections and Infectious Diseases
EGFR	20163722	2010	Bellini et al	Not informed	Southwest	Controls
EGFR	24594201	2014	Carneiro et al	Admixed	Southwest	Oncology
EGFR	24594201	2014	Carneiro et al	Admixed	Southwest	Controls
EGFR	22481252	2012	da Silveira et al	Black	Southwest	Psychiatry and Psychology
EGFR	22481252	2012	da Silveira et al	Diverse	Southwest	Psychiatry and Psychology
EGFR	22481252	2012	da Silveira et al	Black	Southwest	Controls
EGFR	22481252	2012	da Silveira et al	Diverse	Southwest	Controls
EGFR	23207070	2012	Gonzaga et al	Not informed	Southwest	Oncology
EGFR	23207070	2012	Gonzaga et al	Not informed	Southwest	Controls
EGFR	24629097	2014	Leite et al	Not informed	Southwest	Oncology
EGFR	25862854	2015	Vieira et al	Admixed	North	Oncology
EGFR	25862854	2015	Vieira et al	Admixed	North	Oncology
EGFR	25862854	2015	Vieira et al	Admixed	North	Controls
EGFR	29267323	2016	Sobral-Leite et al	Not Informed	Southwest	Oncology
EPHX1	19162321	2009	da Silva Silveira et al	Not informed	Southwest	Oncology
EPHX1	19593802	2010	da Silva Silveira et al	White	Southwest	Oncology
EPHX1	19593802	2010	da Silva Silveira et al	Mixed	Southwest	Oncology
EPHX1	19593802	2010	da Silva Silveira et al	Black	Southwest	Oncology
EPHX1	19330589	2009	da Silva Silveira et al	White	Southwest	Diverse
EPHX1	19330589	2009	da Silva Silveira et al	Mixed	Southwest	Diverse
EPHX1	19330589	2009	da Silva Silveira et al	Black	Southwest	Diverse
EPHX1	28018104	2016	Fernandes et al.	Not informed	Southwest	Controls
EPHX1	28018104	2016	Fernandes et al.	Not informed	Southwest	Oncology
ERBB2	24676663	2014	Araújo et al	Not informed	North	Infections and Infectious Diseases
ERBB2	24676663	2014	Araújo et al	Not informed	Northeast	Infections and Infectious Diseases
ERBB2	24676663	2014	Araújo et al	Not informed	Northeast	Healthy volunteers
ERBB2	23469205	2013	Carraro DM et al	Not informed	Southwest	Oncology
ERBB2	23379433	2013	Pandey JP et al	White	Southwest	Oncology
ERBB2	23379433	2013	Pandey JP et al	Black	Southwest	Oncology
ERBB2	23379433	2013	Pandey JP et al	Yellow	Southwest	Oncology
ERBB2	23379433	2013	Pandey JP et al	Mixed	Southwest	Oncology
ERBB2	24054945	2014	Pandey JP et al	White	Southwest	Oncology
ERBB2	24054945	2014	Pandey JP et al	Black	Southwest	Oncology
ERBB2	24054945	2014	Pandey JP et al	Yellow	Southwest	Oncology
ERBB2	24054945	2014	Pandey JP et al	Mixed	Southwest	Oncology
ERBB2	25636184	2015	Rêgo JL et al	Not informed	Northeast	Infections and Infectious Diseases
ERBB2	25636184	2015	Rêgo JL et al	Not informed	Northeast	Healthy volunteers
ERBB2	33331402	2020	Escórcio-Dourado et al	Not informed	Northeast	Oncology
ERBB2	33331402	2020	Escórcio-Dourado et al	Not informed	Northeast	Controls
ERCC1	25906090	2015	Lopes-Aguiar et al	Not informed	Southwest	Oncology
ERCC1	25906090	2015	Lopes-Aguiar et al	Not informed	Southwest	Oncology
ERCC1	28686330	2017	Carron et al.	Not informed	Southwest	Oncology
ERCC1	26918827	2016	Lopes-Aguiar et al.	Not informed	Southwest	Oncology
ESR1	16242874	2007	Almeida et al	White	South	Healthy volunteers
ESR1	23245353	2013	Rebelo et al	not informed	Southwest	Healthy volunteers
ESR1	20884142	2010	Silva et al	not informed	Southwest	Healthy volunteers
ESR1	22324545	2012	Smiderle et al	not informed	South	Healthy volunteers
ESR1	33146328	2020	Küchler et al	Not informed	South	Healthy volunteers
ESR1	17184825	2007	Aléssio et al	White	Southwest	Diverse
ESR1	17184825	2007	Aléssio et al	Black	Southwest	Diverse
ESR1	17184825	2007	Aléssio et al	White	Southwest	Controls
ESR1	17184825	2007	Aléssio et al	Black	Southwest	Controls
ESR1	17895504	2008	Aléssio et al	White	Southwest	Obstetrics and Gynecology
ESR1	17895504	2008	Aléssio et al	Black	Southwest	Obstetrics and Gynecology
ESR1	17895504	2008	Aléssio et al	White	Southwest	Controls
ESR1	17895504	2008	Aléssio et al	Black	Southwest	Controls
ESR1	16612467	2006	Almeida et al	White	South	Cardiology and Vascular Diseases
ESR1	16612467	2006	Almeida et al	White	South	Controls
ESR1	25077953	2014	Clapauch et al	not informed	Southwest	Diverse
ESR1	25077953	2014	Clapauch et al	not informed	Southwest	Controls
ESR1	23150099	2012	Cordts et al	not informed	Southwest	Obstetrics and Gynecology
ESR1	23150099	2013	Cordts et al	not informed	Southwest	Controls
ESR1	25526766	2014	de Mattos et al	not informed	Southwest	Obstetrics and Gynecology
ESR1	22011627	2012	Gasparotto et al	White	South	Infections and Infectious Diseases
ESR1	22011627	2012	Gasparotto et al	Black	South	Infections and Infectious Diseases
ESR1	16099331	2005	Mansur Ade et al	white	Southwest	Cardiology and Vascular Diseases
ESR1	16099331	2005	Mansur Ade et al	black	Southwest	Cardiology and Vascular Diseases
ESR1	16099331	2005	Mansur Ade et al	Yellow	Southwest	Cardiology and Vascular Diseases
ESR1	16099331	2005	Mansur Ade et al	white	Southwest	Controls
ESR1	16099331	2005	Mansur Ade et al	black	Southwest	Controls
ESR1	16099331	2005	Mansur Ade et al	Yellow	Southwest	Controls
ESR1	24481237	2014	Meyer et al	not informed	Southwest	Obstetrics and Gynecology
ESR1	21824047	2012	Ramos Cirilo et al	not informed	Southwest	Obstetrics and Gynecology
ESR1	21824047	2012	Ramos Cirilo et al	not informed	Southwest	Controls
ESR1	25617525	2015	Silva et al	not informed	Southwest	Obstetrics and Gynecology
ESR1	25617525	2015	Silva et al	not informed	Southwest	Controls
ESR1	16935316	2006	Villanova et al	white	Southwest	Obstetrics and Gynecology
ESR1	16935316	2006	Villanova et al	not informed	Southwest	Obstetrics and Gynecology
ESR1	16935316	2006	Villanova et al	white	Southwest	Controls
ESR1	16935316	2006	Villanova et al	not informed	Southwest	Controls
ESR1	32985343	2020	Cunha et al	Not informed	Southwest	Dental and Oral Health
ESR1	32159700	2020	Silva-Souza et al	Not informed	Southwest	Dental and Oral Health
ESR1	31671406	2019	Scalco et al	Not Informed	Southwest	Ophthalmology
ESR1	31646926	2019	Küchler et al	Not informed	South	Dental and Oral Health
ESR1	31646926	2019	Küchler et al	Not informed	South	Dental and Oral Health
ESR1	31331849	2019	Scariot et al	White	South	Dental and Oral Health
ESR1	31331849	2019	scariot et al	Black	South	Dental and Oral Health
ESR1	31028794	2019	Lopes et al	Not Informed	Southwest	Obstetrics and Gynecology
ESR1	30611552	2019	Vagnini et al	Not Informed	Southwest	Obstetrics and Gynecology
ESR1	30611552	2019	Vagnini et al	Not Informed	Southwest	Controls
ESR1	30539292	2019	Dalledone et al	Not informed	South	Dental and Oral Health
ESR1	30539292	2019	Dalledone et al	Not informed	South	Controls
ESR1	30341791	2019	Arid et al	Mixed	North	Dental and Oral Health
ESR1	30341791	2019	Arid et al	Mixed	North	Controls
ESR1	32000574	2020	Omori et al	White	Southwest	Dental and Oral Health
ESR1	29961922	2018	Horta et al	Not Informed	Southwest	Dental and Oral Health
ESR1	29801469	2018	Soares-Jr et al	White	Southwest	Controls
ESR1	29801469	2018	Soares-Jr et al	Diverse	Southwest	Controls
ESR1	29801469	2018	Soares-Jr et al	White	Southwest	Obstetrics and Gynecology
ESR1	29801469	2018	Soares-Jr et al	Diverse	Southwest	Obstetrics and Gynecology
ESR1	29175417	2017	Quinelato et al	Not informed	Southwest	Controls
ESR1	29175417	2017	Quinelato et al	Not informed	Southwest	Rheumatology
ESR1	29175417	2017	Quinelato et al	Not informed	Southwest	Dental and Oral Health
ESR1	29175417	2017	Quinelato et al	Not informed	Southwest	Dental and Oral Health
ESR1	28199328	2017	Gomes-Rochette et al	Admixed	Southwest	Diverse
ESR1	28109853	2017	Rezende et al	White	Southwest	Oncology
ESR1	28109853	2017	Rezende et al	Not Informed	Southwest	Oncology
ESR1	28109853	2017	Rezende et al	Not Informed	Southwest	Controls
ESR1	27681518	2016	Drehmer et al	Not informed	South	Immunology
ESR1	27681518	2016	Drehmer et al	Not informed	South	Oncology
ESR1	26302681	2015	Smiderle et al	White	South	Cardiology and Vascular Diseases
F2	21320153	2011	Botton et al	White	South	Cardiology and Vascular Diseases
F2	9723576	1998	Andrade et al	not informed	Southwest	Hematology
F2	9723576	1998	Andrade et al	not informed	Southwest	Hematology
F2	9723576	1998	Andrade et al	not informed	Southwest	Hematology
F2	11755949	2001	Arnaldi et al	not informed	Southwest	Diverse
F2	9890294	1999	Arruda et al	not informed	Southwest	Cardiology and Vascular Diseases
F2	9890294	1999	Arruda et al	not informed	Southwest	Controls
F2	15481892	2004	Couto et al	not informed	Northeast	Hematology
F2	17401546	2007	de Paula Sabino et al	not informed	Southwest	Diverse
F2	17401546	2007	de Paula Sabino et al	not informed	Southwest	Controls
F2	24493127	2014	Domingos et al	not informed	Northeast	Hematology
F2	24564524	2014	Dutra et al	White	South	Obstetrics and Gynecology
F2	24564524	2014	Dutra et al	not informed	South	Obstetrics and Gynecology
F2	24564524	2014	Dutra et al	White	South	Controls
F2	24564524	2014	Dutra et al	not informed	South	Controls
F2	9835442	1998	Fabri et al	not informed	Southwest	Diverse
F2	9835442	1998	Fabri et al	not informed	Southwest	Controls
F2	21755116	2011	Filho et al	not informed	Southwest	Diverse
F2	21755116	2011	Filho et al	not informed	Southwest	Hematology
F2	20829682	2010	Mello et al	not informed	Southwest	Diverse
F2	24252537	2014	Orikaza et al	not informed	Southwest	Diverse
F2	24252537	2014	Orikaza et al	not informed	Southwest	Psychiatry and Psychology
F2	24252537	2014	Orikaza et al	not informed	Southwest	Controls
F2	15359390	2004	Pinto et al	White	South	Gastroenterology
F2	15359390	2004	Pinto et al	not informed	South	Controls
F2	15359390	2004	Pinto et al	not informed	South	Controls
F2	12757770	2003	Ramacciotti et al	White	Southwest	Diverse
F2	12757770	2003	Ramacciotti et al	Black	Southwest	Diverse
F2	12757770	2003	Ramacciotti et al	Yellow	Southwest	Diverse
F2	12757770	2003	Ramacciotti et al	White	Southwest	Oncology
F2	12757770	2003	Ramacciotti et al	Black	Southwest	Oncology
F2	12757770	2003	Ramacciotti et al	Mixed	Southwest	Oncology
F2	12757770	2003	Ramacciotti et al	Yellow	Southwest	Oncology
F2	18235909	2007	Biancardi AL et al	White	Southwest	Ophthalmology
F2	18235909	2007	Biancardi AL et al	Black	Southwest	Ophthalmology
F2	18235909	2007	Biancardi AL et al	White	Southwest	Controls
F2	18235909	2007	Biancardi AL et al	Black	Southwest	Controls
F2	15644626	2005	Camargo EC e tal	White	Southwest	Psychiatry and Psychology
F2	15644626	2005	Camargo EC e tal	Diverse	Southwest	Psychiatry and Psychology
F2	15644626	2005	Camargo EC e tal	Yellow	Southwest	Psychiatry and Psychology
F2	20337814	2010	Di Giacomo TB et al	not informed	Southwest	Dermatology
F2	21755116	2011	Filho IL et al	not informed	Southwest	Hematology
F2	21755116	2011	Filho IL et al	not informed	Southwest	Diverse
F2	15528884	2005	Gadelha T et al	White	Southwest	Psychiatry and Psychology
F2	15528884	2005	Gadelha T et al	Black	Southwest	Psychiatry and Psychology
F2	15528884	2005	Gadelha T et al	White	Southwest	Controls
F2	15528884	2005	Gadelha T et al	Black	Southwest	Controls
F2	16963292	2006	Moreira Neto F et al	White	South	Obstetrics and Gynecology
F2	16963292	2006	Moreira Neto F et al	Black	South	Obstetrics and Gynecology
F2	16963292	2006	Moreira Neto F et al	White	South	Controls
F2	16963292	2006	Moreira Neto F et al	Black	South	Controls
F2	14502338	2004	Pinto RB et al	White	South	Gastroenterology
F2	14502338	2004	Pinto RB et al	not informed	South	Controls
F2	11085290	2000	Torresan M et al	not informed	Southwest	Rheumatology
F2	10739378	2000	Voetsch B et al	White	Not informed	Psychiatry and Psychology
F2	10739378	2000	Voetsch B et al	Black	Not informed	Psychiatry and Psychology
F2	10739378	2000	Voetsch B et al	not informed	Not informed	Controls
F2	15821810	2005	Couto E et al	white	Southwest	Obstetrics and Gynecology
F2	15821810	2005	Couto E et al	not informed	Southwest	Obstetrics and Gynecology
F2	15821810	2005	Couto E et al	white	Southwest	Controls
F2	15821810	2005	Couto E et al	not informed	Southwest	Controls
F2	17097210	2007	Dusse LM et al	not informed	Southwest	Obstetrics and Gynecology
F2	17097210	2007	Dusse LM et al	not informed	Southwest	Controls
F2	11943942	2002	Morelli VM et al	Diverse	Southwest	Cardiology and Vascular Diseases
F2	11943942	2002	Morelli VM et al	Diverse	Southwest	Controls
F2	28501666	2017	Sobreira et al	Not Informed	Southwest	Cardiology and Vascular Diseases
F2	21919702	2012	Stur et al	White	Southwest	Healthy volunteers
F5	9723576	1998	Andrade et al	not informed	Southwest	Hematology
F5	9723576	1998	Andrade et al	not informed	Southwest	Hematology
F5	9723576	1998	Andrade et al	not informed	Southwest	Hematology
F5	11755949	2001	Arnaldi et al	not informed	Southwest	Diverse
F5	9890294	1999	Arruda et al	not informed	Southwest	Cardiology and Vascular Diseases
F5	9890294	1999	Arruda et al	not informed	Southwest	Controls
F5	17401546	2007	de Paula Sabino et al	not informed	Southwest	Diverse
F5	17401546	2007	de Paula Sabino et al	not informed	Southwest	Controls
F5	24493127	2014	Domingos et al	not informed	Northeast	Hematology
F5	24564524	2014	Dutra et al	White	South	Obstetrics and Gynecology
F5	24564524	2014	Dutra et al	Not informed	South	Obstetrics and Gynecology
F5	24564524	2014	Dutra et al	White	South	Controls
F5	24564524	2014	Dutra et al	Not informed	South	Controls
F5	9835442	1998	Fabri et al	not informed	Southwest	Diverse
F5	9835442	1998	Fabri et al	not informed	Southwest	Controls
F5	20829682	2010	Mello et al	not informed	Southwest	Diverse
F5	24252537	2014	Orikaza et al	not informed	Southwest	Diverse
F5	24252537	2014	Orikaza et al	not informed	Southwest	Psychiatry and Psychology
F5	24252537	2014	Orikaza et al	not informed	Southwest	Controls
F5	15359390	2004	Pinto et al	White	South	Gastroenterology
F5	15359390	2004	Pinto et al	not informed	South	Controls
F5	15359390	2004	Pinto et al	not informed	South	Controls
F5	12757770	2003	Ramacciotti et al	White	Southwest	Diverse
F5	12757770	2003	Ramacciotti et al	Black	Southwest	Diverse
F5	12757770	2003	Ramacciotti et al	Yellow	Southwest	Diverse
F5	12757770	2003	Ramacciotti et al	White	Southwest	Oncology
F5	12757770	2003	Ramacciotti et al	Black	Southwest	Oncology
F5	12757770	2003	Ramacciotti et al	Mixed	Southwest	Oncology
F5	12757770	2003	Ramacciotti et al	Yellow	Southwest	Oncology
F5	7604818	1995	Arruda VR et al	not informed	Southwest	Cardiology and Vascular Diseases
F5	7604818	1995	Arruda VR et al	not informed	Southwest	Pulmonary and Respiratory Diseases
F5	7604818	1995	Arruda VR et al	not informed	Southwest	Diverse
F5	7604818	1995	Arruda VR et al	not informed	Southwest	Psychiatry and Psychology
F5	7604818	1995	Arruda VR et al	not informed	Southwest	Diverse
F5	7604818	1995	Arruda VR et al	not informed	Southwest	Diverse
F5	7604818	1995	Arruda VR et al	not informed	Southwest	Controls
F5	18235909	2007	Biancardi AL et al	White	Southwest	Ophthalmology
F5	18235909	2007	Biancardi AL et al	Black	Southwest	Ophthalmology
F5	18235909	2007	Biancardi AL et al	White	Southwest	Controls
F5	18235909	2007	Biancardi AL et al	Black	Southwest	Controls
F5	15644626	2005	Camargo EC e tal	White	Southwest	Psychiatry and Psychology
F5	15644626	2005	Camargo EC e tal	Diverse	Southwest	Psychiatry and Psychology
F5	15644626	2005	Camargo EC e tal	Yellow	Southwest	Psychiatry and Psychology
F5	16109904	2005	Carod-Artal FJ et al	not informed	Center west	Psychiatry and Psychology
F5	20337814	2010	Di Giacomo TB et al	not informed	Southwest	Dermatology
F5	21755116	2011	Filho IL et al	not informed	Southwest	Hematology
F5	21755116	2011	Filho IL et al	not informed	Southwest	Diverse
F5	15528884	2005	Gadelha T et al	White	Southwest	Psychiatry and Psychology
F5	15528884	2005	Gadelha T et al	Black	Southwest	Psychiatry and Psychology
F5	15528884	2005	Gadelha T et al	White	Southwest	Controls
F5	15528884	2005	Gadelha T et al	Black	Southwest	Controls
F5	21637678	2009	Lima MB et al	not informed	Northeast	Cardiology and Vascular Diseases
F5	21637678	2009	Lima MB et al	not informed	Northeast	Controls
F5	9792948	1998	Camacho-Lobato L et al	not informed	Southwest	Diverse
F5	16963292	2006	Moreira Neto F et al	White	South	Obstetrics and Gynecology
F5	16963292	2006	Moreira Neto F et al	Black	South	Obstetrics and Gynecology
F5	16963292	2006	Moreira Neto F et al	White	South	Controls
F5	16963292	2006	Moreira Neto F et al	Black	South	Controls
F5	9157577	1997	Seixas CA et al	not informed	Not informed	Gastroenterology
F5	9157577	1997	Seixas CA et al	not informed	Not informed	Controls
F5	14502338	2004	Pinto RB et al	White	South	Gastroenterology
F5	14502338	2004	Pinto RB et al	not informed	South	Controls
F5	11085290	2000	Torresan M et al	not informed	Southwest	Rheumatology
F5	10739378	2000	Voetsch B et al	White	Not informed	Psychiatry and Psychology
F5	10739378	2000	Voetsch B et al	Black	Not informed	Psychiatry and Psychology
F5	10739378	2000	Voetsch B et al	not informed	Not informed	Controls
F5	15821810	2005	Couto E et al	white	Southwest	Obstetrics and Gynecology
F5	15821810	2005	Couto E et al	not informed	Southwest	Obstetrics and Gynecology
F5	15821810	2005	Couto E et al	white	Southwest	Controls
F5	15821810	2005	Couto E et al	not informed	Southwest	Controls
F5	17097210	2007	Dusse LM et al	not informed	Southwest	Obstetrics and Gynecology
F5	17097210	2007	Dusse LM et al	not informed	Southwest	Controls
F5	11943942	2002	Morelli VM et al	Diverse	Southwest	Cardiology and Vascular Diseases
F5	11943942	2002	Morelli VM et al	Diverse	Southwest	Controls
F5	29523280	2017	Baptista et al	Diverse	Southwest	Diverse
F5	29523280	2017	Baptista et al	Diverse	Southwest	Diverse
F5	29523280	2017	Baptista et al	Diverse	Southwest	Obstetrics and Gynecology
F5	29523280	2017	Baptista et al	Diverse	Southwest	Diverse
F5	30991243	2019	Pires et al.	Not informed	Southwest	Psychiatry and Psychology
F5	28501666	2017	Sobreira et al.	Diverse	Southwest	Cardiology and Vascular Diseases
F5	24463599	2015	Lino et al.	Diverse	Southwest	Obstetrics and Gynecology
F5	24463599	2015	Lino et al.	Diverse	Southwest	Controls
F5	21919702	2012	Stur et al	White	Southwest	Healthy volunteers
F5	10064012	1999	Franco et al	White	not informed	Healthy volunteers
F5	10064012	1999	Franco et al	Black	not informed	Healthy volunteers
F5	10064012	1999	Franco et al	Yellow	not informed	Healthy volunteers
F5	10064012	1999	Franco et al	Native (26 Kayapo, 12 Arara, 24 Yanomami, 25 Wayampi and 22 Wayana-Apalai)	not informed	Healthy volunteers
F5	25955572	2015	Niewiadonski et al	Not informed	Southwest	Healthy volunteers
F5	29713005	2018	Rodrigues-Soares et al.	Diverse	South	Healthy volunteers
F5	29713005	2018	Rodrigues-Soares et al.	Diverse	Southwest	Healthy volunteers
F5	29713005	2018	Rodrigues-Soares et al.	Diverse	Northeast	Healthy volunteers
FCGR3A	23379433	2013	Pandey et al	White	Southwest	Oncology
FCGR3A	23379433	2013	Pandey et al	Black	Southwest	Oncology
FCGR3A	23379433	2013	Pandey et al	Yellow	Southwest	Oncology
FCGR3A	23379433	2013	Pandey et al	Mixed	Southwest	Oncology
FCGR3A	24054945	2014	Pandey et al	White	Southwest	Oncology
FCGR3A	24054945	2014	Pandey et al	Black	Southwest	Oncology
FCGR3A	24054945	2014	Pandey et al	Yellow	Southwest	Oncology
FCGR3A	24054945	2014	Pandey et al	White	Southwest	Controls
FCGR3A	24054945	2014	Pandey et al	Black	Southwest	Controls
FCGR3A	24054945	2014	Pandey et al	Yellow	Southwest	Controls
FCGR3A	21924179	2011	Siqueira et al	Pacientes	Southwest	Dental and Oral Health
FCGR3A	21924179	2011	Siqueira et al	Controls	Southwest	Controls
FCGR3A	27609290	2016	Dourado Júnior et al	Not informed	Northeast	Psychiatry and Psychology
FCGR3A	27609290	2016	Dourado Júnior et al	Not informed	Northeast	Controls
FCGR3A	27914599	2016	Grecco et al.	Black	Southwest	Rheumatology
FCGR3A	27914599	2016	Grecco et al.	White	Southwest	Rheumatology
FCGR3A	27914599	2016	Grecco et al.	Mixed	Southwest	Rheumatology
FCGR3A	27914599	2016	Grecco et al.	Black	Southwest	Controls
FCGR3A	27914599	2016	Grecco et al.	White	Southwest	Controls
FCGR3A	27914599	2016	Grecco et al.	Mixed	Southwest	Controls
G6PD	22580719	2012	Alencastro de Azevedo et al	White	South	Hepatology
G6PD	22580719	2012	Alencastro de Azevedo et al	Black	South	Hepatology
G6PD	22580719	2012	Alencastro de Azevedo et al	White	South	Controls
G6PD	22580719	2012	Alencastro de Azevedo et al	Black	South	Controls
G6PD	1841426	1991	Barraviera et al	Not informed	Southwest	Infections and Infectious Diseases
G6PD	20376058	2010	Mezzacappa MA et al	white	Southwest	Hepatology
G6PD	20376058	2010	Mezzacappa MA et al	black	Southwest	Hepatology
G6PD	20376058	2010	Mezzacappa MA et al	asian	Southwest	Hepatology
G6PD	20376058	2010	Mezzacappa MA et al	white	Southwest	Controls
G6PD	20376058	2010	Mezzacappa MA et al	black	Southwest	Controls
G6PD	20376058	2010	Mezzacappa MA et al	asian	Southwest	Controls
G6PD	14978696	2004	Agudelo-Flórez P et al	mixed	Southwest	Diverse
G6PD	5694903	1968	Beiguelman B et al	White	Southwest	Infections and Infectious Diseases
G6PD	5694903	1968	Beiguelman B et al	Black	Southwest	Infections and Infectious Diseases
G6PD	5694903	1968	Beiguelman B et al	White	Southwest	Controls
G6PD	23569738	2011	Carvalho CG et al	white	South	Hepatology
G6PD	23569738	2011	Carvalho CG et al	black	South	Hepatology
G6PD	23569738	2011	Carvalho CG et al	Mixed	South	Hepatology
G6PD	23569738	2011	Carvalho CG et al	white	South	Controls
G6PD	23569738	2011	Carvalho CG et al	black	South	Controls
G6PD	23569738	2011	Carvalho CG et al	Mixed	South	Controls
G6PD	17320848	2007	Castro SM et al	Not informed	South	Genetic Disease
G6PD	24493127	2014	Domingos IF et al	Not informed	Northeast	Cardiology and Vascular Diseases
G6PD	21637675	2009	Oliveira RA et al	Not informed	Southwest	Healthy volunteers
G6PD	25385861	2015	Osorio L et al	Not informed	North	Infections and Infectious Diseases
G6PD	1655604	1991	Saad MJ et al	white	Southwest	Genetic Disease
G6PD	1655604	1991	Saad MJ et al	Black	Southwest	Genetic Disease
G6PD	1655604	1991	Saad MJ et al	not informed	Southwest	Controls
G6PD	7812018	1995	Saad ST et al	not informed	Southwest	Cardiology and Vascular Diseases
G6PD	9298828	1997	Saad ST et al	White	Southwest	Cardiology and Vascular Diseases
G6PD	9017974	1997	Saad ST et al	Not informed	Southwest	Genetic Disease
G6PD	1572671	1992	Saad ST et al	Not informed	Southwest	Cardiology and Vascular Diseases
G6PD	1572671	1992	Saad ST et al	Not informed	Southwest	Cardiology and Vascular Diseases
G6PD	1572671	1992	Saad ST et al	Not informed	Southwest	Cardiology and Vascular Diseases
G6PD	12737938	2003	Saad ST et al	Not informed	Southwest	Genetic Disease
G6PD	4200437	1973	Salzano FM et al	Not informed	Southwest	Cardiology and Vascular Diseases
G6PD	4200437	1973	Salzano FM et al	Not informed	Southwest	Controls
G6PD	12367584	2002	Hamel AR et al	Not informed	North	Genetic Disease
G6PD	1874475	1991	Monte Alegre S et al	Not informed	Not Informed	Genetic Disease
G6PD	1874475	1991	Monte Alegre S et al	Not informed	Not Informed	Controls
G6PD	16792831	2006	Castro et al	White	South	Healthy volunteers
G6PD	16792831	2006	Castro et al	Black	South	Healthy volunteers
G6PD	10883032	2000	Compri et al	not informed	Southwest	Healthy volunteers
G6PD	5771222	1969	Saldanha et al	White	Southwest	Healthy volunteers
G6PD	5771222	1969	Saldanha et al	Black	Southwest	Healthy volunteers
G6PD	5771222	1969	Saldanha et al	Yellow	Southwest	Healthy volunteers
G6PD	976992	1976	Saldanha et al	Native Americans	Center west	Healthy volunteers
G6PD	19370159	2009	Santana et al	White	North	Healthy volunteers
G6PD	19370159	2009	Santana et al	Not informed	North	Healthy volunteers
G6PD	24865682	2014	Santana et al	not informed	North	Healthy volunteers
G6PD	8436389	1993	Weimer et al	White	South	Healthy volunteers
G6PD	8436389	1993	Weimer et al	Black	South	Healthy volunteers
G6PD	8436389	1993	Weimer et al	Admixed	Northeast	Healthy volunteers
G6PD	8436389	1993	Weimer et al	Native Americans	North	Healthy volunteers
G6PD	8436389	1993	Weimer et al	Native Americans	Diverse	Healthy volunteers
G6PD	8436389	1993	Weimer et al	not informed	South	Healthy volunteers
G6PD	30753364	2019	Brito-Souza et al	Not informed	North	Infections and Infectious Diseases
G6PD	30673054	2019	Pereira et al	White	Southwest	Healthy volunteers
G6PD	30673054	2019	Pereira et al	Black	Southwest	Healthy volunteers
G6PD	30673054	2019	Pereira et al	Mixed	Southwest	Healthy volunteers
G6PD	30673054	2019	Pereira et al	Not informed	Southwest	Healthy volunteers
G6PD	30650326	2019	Llana-Cuentas et al	Not Informed	North	Infections and Infectious Diseases
G6PD	30650322	2019	Lacerda et al	Not Informed	North	Infections and Infectious Diseases
G6PD	30508000	2018	de Oliveira et al	Black	North	Healthy volunteers
G6PD	28619120	2017	Dombrowski et al	Admixed	North	Healthy volunteers
G6PD	28619120	2017	Dombrowski et al	White	North	Healthy volunteers
G6PD	28619120	2017	Dombrowski et al	Black	North	Healthy volunteers
G6PD	28619120	2017	Dombrowski et al	Not Informed	North	Healthy volunteers
G6PD	27598631	2016	Brito et al	Admixed	North	Infections and Infectious Diseases
G6PD	27598631	2016	Brito et al	White	North	Infections and Infectious Diseases
G6PD	27598631	2016	Brito et al	Black	North	Infections and Infectious Diseases
G6PD	27598631	2016	Brito et al	Admixed	North	Controls
G6PD	27598631	2016	Brito et al	White	North	Controls
G6PD	27598631	2016	Brito et al	Black	North	Controls
G6PD	26840990	2016	Belisário et al	Not informed	Southwest	Dermatology
G6PD	16792831	2006	Castro et al	Mixed	South	Healthy volunteers
G6PD	5732546	1968	Lewgoy and Salzano	white	South	Healthy volunteers
G6PD	5732546	1968	Lewgoy and Salzano	Mixed	South	Healthy volunteers
G6PD	5732546	1968	Lewgoy and Salzano	Black	South	Healthy volunteers
G6PD	976992	1976	Saldanha et al	Native Americans	Center west	Healthy volunteers
G6PD	8436389	1993	Weimer et al	White	South	Healthy volunteers
G6PD	8436389	1993	Weimer et al	Black	South	Healthy volunteers
G6PD	8436389	1993	Weimer et al	Admixture	Northeast	Healthy volunteers
G6PD	8436389	1993	Weimer et al	Native Americans	North	Healthy volunteers
G6PD	8436389	1993	Weimer et al	Native Americans	Diverse	Healthy volunteers
GNB3	16897596	2007	Prestes et al	White	South	Controls
GNB3	20185488	2010	Chemello et al	White	South	Cardiology and Vascular Diseases
GNB3	20185488	2010	Chemello et al	Not informed	South	Cardiology and Vascular Diseases
GNB3	18855531	2008	Kohlrausch et al	White	South	Psychiatry and Psychology
GNB3	16897596	2007	Prestes et al	Not informed	South	Psychiatry and Psychology
GNB3	16897596	2007	Prestes et al	Not informed	South	Psychiatry and Psychology
GNB3	16897596	2007	Prestes et al	White	South	Psychiatry and Psychology
GNB3	27806373	2016	Nicoletti et al.	Admixed	Southwest	Nutrition
GNB3	16487269	2006	Danoviz	White	Southwest	Healthy volunteers
GNB3	16487269	2006	Danoviz	Mixed	Southwest	Healthy volunteers
GNB3	16487269	2006	Danoviz	Black	Southwest	Healthy volunteers
GNB3	16487269	2006	Danoviz	Not informed	Southwest	Healthy volunteers
GNB3	16493638	2006	Mattevi et al	White	South	Healthy volunteers
GNB3	23056922	2012	Kimura et al	Black	Southwest	Healthy volunteers
GNB3	18058092	2008	Vargens et al	White	Southwest	Healthy volunteers
GNB3	18058092	2008	Vargens et al	Mixed	Southwest	Healthy volunteers
GNB3	18058092	2008	Vargens et al	Black	Southwest	Healthy volunteers
GNB3	29713005	2018	Rodrigues-Soares et al.	Diverse	South	Healthy volunteers
GNB3	29713005	2018	Rodrigues-Soares et al.	Diverse	Southwest	Healthy volunteers
GNB3	29713005	2018	Rodrigues-Soares et al.	Diverse	Northeast	Healthy volunteers
GSTA1	25251951	2014	Sa et al	Not informed	Southwest	Oncology
GSTA1	25251951	2014	Sa et al	Not informed	Southwest	Controls
GSTA1	31539757	2019	De Marchi et al.	Not informed	Southwest	Oncology
GSTM1	20812880	2011	Abreu-Silva et al	White	Southwest	Otolaryngology
GSTM1	20812880	2011	Abreu-Silva et al	Mixed	Southwest	Otolaryngology
GSTM1	20812880	2011	Abreu-Silva et al	Black	Southwest	Otolaryngology
GSTM1	20812880	2011	Abreu-Silva et al	White	Southwest	Otolaryngology
GSTM1	20812880	2011	Abreu-Silva et al	Mixed	Southwest	Otolaryngology
GSTM1	20812880	2011	Abreu-Silva et al	Black	Southwest	Otolaryngology
GSTM1	20812880	2011	Abreu-Silva et al	White	Southwest	Controls
GSTM1	20812880	2011	Abreu-Silva et al	Mixed	Southwest	Controls
GSTM1	20812880	2011	Abreu-Silva et al	Black	Southwest	Controls
GSTM1	20093049	2011	Bazo et al	Not informed	Southwest	Cardiology and Vascular Diseases
GSTM1	20093049	2011	Bazo et al	Not informed	Southwest	Controls
GSTM1	17221058	2006	Biselli et al	Not informed	Southwest	Oncology
GSTM1	17221058	2006	Biselli et al	Not informed	Southwest	Controls
GSTM1	17158763	2006	Bufalo et al	White	Southwest	Oncology
GSTM1	17158763	2006	Bufalo et al	Not informed	Southwest	Oncology
GSTM1	17158763	2006	Bufalo et al	White	Southwest	Controls
GSTM1	17158763	2006	Bufalo et al	Not informed	Southwest	Controls
GSTM1	17980001	2008	Bufalo et al	White	Southwest	Endocrinology
GSTM1	17980001	2008	Bufalo et al	Not informed	Southwest	Endocrinology
GSTM1	17980001	2008	Bufalo et al	White	Southwest	Controls
GSTM1	17980001	2008	Bufalo et al	Not informed	Southwest	Controls
GSTM1	15215328	2004	Burim et al	Diverse	Southwest	Diverse
GSTM1	15215328	2004	Burim et al	Diverse	Southwest	Diverse
GSTM1	15215328	2004	Burim et al	Diverse	Southwest	Psychiatry and Psychology
GSTM1	15215328	2004	Burim et al	White	Southwest	Controls
GSTM1	15215328	2004	Burim et al	Black	Southwest	Controls
GSTM1	15215328	2004	Burim et al	Mixed	Southwest	Controls
GSTM1	20049629	2010	Cabral et al	White	Southwest	Oncology
GSTM1	20049629	2010	Cabral et al	Black	Southwest	Oncology
GSTM1	20049629	2010	Cabral et al	White	Southwest	Controls
GSTM1	20049629	2010	Cabral et al	Black	Southwest	Controls
GSTM1	14991750	2004	Canalle et al	White	Southwest	Oncology
GSTM1	14991750	2004	Canalle et al	Black	Southwest	Oncology
GSTM1	14991750	2004	Canalle et al	Mixed	Southwest	Oncology
GSTM1	14991750	2004	Canalle et al	White	Southwest	Controls
GSTM1	14991750	2004	Canalle et al	Black	Southwest	Controls
GSTM1	14991750	2004	Canalle et al	Mixed	Southwest	Controls
GSTM1	15112335	2004	Colombo et al	White	Southwest	Oncology
GSTM1	15112335	2004	Colombo et al	Black	Southwest	Oncology
GSTM1	15112335	2004	Colombo et al	White	Southwest	Gastroenterology
GSTM1	15112335	2004	Colombo et al	Black	Southwest	Gastroenterology
GSTM1	15112335	2004	Colombo et al	White	Southwest	Controls
GSTM1	15112335	2004	Colombo et al	Black	Southwest	Controls
GSTM1	22788240	2012	Costa et al	Diverse	Northeast	Infections and Infectious Diseases
GSTM1	22788240	2012	Costa et al	Not informed	Northeast	Infections and Infectious Diseases
GSTM1	20391338	2010	Coutinho et al	Not informed	Southwest	Psychiatry and Psychology
GSTM1	20391338	2010	Coutinho et al	Not informed	Southwest	Controls
GSTM1	22782090	2012	de Aguiar et al	White	South	Oncology
GSTM1	22782090	2012	de Aguiar et al	Not informed	South	Oncology
GSTM1	18829006	2009	de Oliveira et al	Mixed	Southwest	Obstetrics and Gynecology
GSTM1	18829006	2009	de Oliveira et al	Mixed	Southwest	Controls
GSTM1	23590899	2013	de Oliveira Filho et al	Not informed	Northeast	Hematology
GSTM1	26125818	2015	de P R Júnior et al	White	Center west	Ophthalmology
GSTM1	26125818	2015	de P R Júnior et al	Mixed	Center west	Ophthalmology
GSTM1	26125818	2015	de P R Júnior et al	Black	Center west	Ophthalmology
GSTM1	26125818	2015	de P R Júnior et al	White	Center west	Controls
GSTM1	26125818	2015	de P R Júnior et al	Mixed	Center west	Controls
GSTM1	26125818	2015	de P R Júnior et al	Black	Center west	Controls
GSTM1	12175533	2002	da Fonte de Amorim et al	White	Southwest	Oncology
GSTM1	12175533	2002	da Fonte de Amorim et al	Not informed	Southwest	Oncology
GSTM1	12175533	2002	da Fonte de Amorim et al	White	Southwest	Controls
GSTM1	12175533	2002	da Fonte de Amorim et al	Not informed	Southwest	Controls
GSTM1	14662415	2004	Drummond et al	Not informed	Southwest	Oncology
GSTM1	14662415	2004	Drummond et al	Not informed	Southwest	Controls
GSTM1	16519766	2006	Duarte et al	Not informed	Southwest	Dental and Oral Health
GSTM1	16519766	2006	Duarte et al	Not informed	Southwest	Controls
GSTM1	18507060	2008	Duarte et al	Not informed	Southwest	Dental and Oral Health
GSTM1	18507060	2008	Duarte et al	Not informed	Southwest	Controls
GSTM1	23979901	2013	Frare et al	Not informed	Center west	Obstetrics and Gynecology
GSTM1	23979901	2013	Frare et al	Not informed	Center west	Controls
GSTM1	23099118	2013	Forestiero et al	White	Diverse	Infections and Infectious Diseases
GSTM1	23099118	2013	Forestiero et al	Black	Diverse	Infections and Infectious Diseases
GSTM1	23099118	2013	Forestiero et al	White	Diverse	Controls
GSTM1	23099118	2013	Forestiero et al	Black	Diverse	Controls
GSTM1	16721740	2006	Gattás et al	White	Southwest	Oncology
GSTM1	16721740	2006	Gattás et al	Not informed	Southwest	Oncology
GSTM1	16721740	2006	Gattás et al	White	Southwest	Controls
GSTM1	16721740	2006	Gattás et al	Not informed	Southwest	Controls
GSTM1	24981927	2014	Glesse et al	White	South	Rheumatology
GSTM1	24981927	2014	Glesse et al	Black	South	Rheumatology
GSTM1	18979064	2009	Grando et al	White	South	Oncology
GSTM1	18979064	2009	Grando et al	Black	South	Oncology
GSTM1	18979064	2009	Grando et al	Yellow	South	Oncology
GSTM1	18979064	2009	Grando et al	White	South	Controls
GSTM1	18979064	2009	Grando et al	Black	South	Controls
GSTM1	18979064	2009	Grando et al	Yellow	South	Controls
GSTM1	17418613	2008	Hatagima et al	White	Southwest	Oncology
GSTM1	17418613	2008	Hatagima et al	Diverse	Southwest	Oncology
GSTM1	17418613	2008	Hatagima et al	White	Southwest	Controls
GSTM1	17418613	2008	Hatagima et al	Diverse	Southwest	Controls
GSTM1	18280004	2008	Honma et al	White	Southwest	Oncology
GSTM1	18280004	2008	Honma et al	Black	Southwest	Oncology
GSTM1	18280004	2008	Honma et al	White	Southwest	Controls
GSTM1	18280004	2008	Honma et al	Black	Southwest	Controls
GSTM1	17505575	2007	Leite et al	White	Southwest	Dermatology
GSTM1	17505575	2007	Leite et al	White	Southwest	Oncology
GSTM1	17505575	2007	Leite et al	Not informed	Southwest	Oncology
GSTM1	17505575	2007	Leite et al	White	Southwest	Oncology
GSTM1	17505575	2007	Leite et al	White	Southwest	Oncology
GSTM1	17505575	2007	Leite et al	Not informed	Southwest	Oncology
GSTM1	17505575	2007	Leite et al	White	Southwest	Controls
GSTM1	17505575	2007	Leite et al	Not informed	Southwest	Controls
GSTM1	18647550	2008	Lima Jr et al	Not informed	Southwest	Urology
GSTM1	18647550	2008	Lima Jr et al	Not informed	Southwest	Oncology
GSTM1	21637410	2010	Lima et al	White	Southwest	Immunology
GSTM1	21637410	2010	Lima et al	Black	Southwest	Immunology
GSTM1	21637410	2010	Lima et al	White	Southwest	Controls
GSTM1	21637410	2010	Lima et al	Black	Southwest	Controls
GSTM1	22407040	2012	Lima et al	White	Southwest	Several
GSTM1	22407040	2012	Lima et al	Black	Southwest	Several
GSTM1	16238106	2005	Linhares et al	White	Southwest	Oncology
GSTM1	16238106	2005	Linhares et al	Black	Southwest	Oncology
GSTM1	16238106	2005	Linhares et al	White	Southwest	Controls
GSTM1	16238106	2005	Linhares et al	Black	Southwest	Controls
GSTM1	25992585	2015	Lopes et al	White	Southwest	Oncology
GSTM1	25992585	2015	Lopes et al	Diverse	Southwest	Oncology
GSTM1	25992585	2015	Lopes et al	White	Southwest	Controls
GSTM1	25992585	2015	Lopes et al	Diverse	Southwest	Controls
GSTM1	25906090	2015	Lopes-Aguiar et al	Not informed	Southwest	Oncology
GSTM1	25906090	2015	Lopes-Aguiar et al	Not informed	Southwest	Oncology
GSTM1	22576927	2012	Lordelo et al	White	Center west	Oncology
GSTM1	22576927	2012	Lordelo et al	Mixed	Center west	Oncology
GSTM1	22576927	2012	Lordelo et al	Black	Center west	Oncology
GSTM1	22576927	2012	Lordelo et al	White	Center west	Controls
GSTM1	22576927	2012	Lordelo et al	Mixed	Center west	Controls
GSTM1	22576927	2012	Lordelo et al	Black	Center west	Controls
GSTM1	18507050	2008	Losi-Guembarovski et al	Not informed	South	Oncology
GSTM1	18507050	2008	Losi-Guembarovski et al	Not informed	South	Controls
GSTM1	19391035	2009	Lourenço et al	White	Southwest	Oncology
GSTM1	19391035	2009	Lourenço et al	Black	Southwest	Oncology
GSTM1	19391035	2009	Lourenço et al	White	Southwest	Controls
GSTM1	19391035	2009	Lourenço et al	Black	Southwest	Controls
GSTM1	20977336	2010a	Lourenço et al	Not informed	Southwest	Oncology
GSTM1	20563767	2010b	Lourenço et al	White	Southwest	Oncology
GSTM1	20563767	2010	Lourenço et al	Black	Southwest	Oncology
GSTM1	21870186	2011	Lourenço et al	White	Southwest	Oncology
GSTM1	21870186	2011	Lourenço et al	Black	Southwest	Oncology
GSTM1	21870186	2011	Lourenço et al	White	Southwest	Controls
GSTM1	21870186	2011	Lourenço et al	Black	Southwest	Controls
GSTM1	19419718	2009	Maciel et al	Mixed	Southwest	Cardiology and Vascular Diseases
GSTM1	19419718	2009	Maciel et al	Mixed	Southwest	Controls
GSTM1	23802802	2013	Maniglia et al	White	Southwest	Otolaryngology
GSTM1	21359474	2011	Marchioni et al	White	Southwest	Oncology
GSTM1	21359474	2011	Marchioni et al	Not informed	Southwest	Oncology
GSTM1	21359474	2011	Marchioni et al	White	Southwest	Diverse
GSTM1	21359474	2011	Marchioni et al	Not informed	Southwest	Diverse
GSTM1	23758905	2013	Marson et al	Not informed	Southwest	Several
GSTM1	24593045	2014	Marson et al	Not informed	Southwest	Several
GSTM1	21053180	2010	Miranda-Vilela et al	Not informed	Center west	Cardiology and Vascular Diseases
GSTM1	21053180	2010	Miranda-Vilela et al	Not informed	Center west	Controls
GSTM1	21053180	2010	Miranda-Vilela et al	White	Center west	Cardiology and Vascular Diseases
GSTM1	21053180	2010	Miranda-Vilela et al	Mixed	Center west	Cardiology and Vascular Diseases
GSTM1	21053180	2010	Miranda-Vilela et al	Black	Center west	Cardiology and Vascular Diseases
GSTM1	21053180	2010	Miranda-Vilela et al	White	Center west	Controls
GSTM1	21053180	2010	Miranda-Vilela et al	Mixed	Center west	Controls
GSTM1	21053180	2010	Miranda-Vilela et al	Black	Center west	Controls
GSTM1	22845549	2012	Monteiro et al	White	Southwest	Infections and Infectious Diseases
GSTM1	22845549	2012	Monteiro et al	Not informed	Southwest	Infections and Infectious Diseases
GSTM1	22782580	2012	Moraes et al	Not informed	Center west	Oncology
GSTM1	18392488	2008	Morais et al	Not informed	Southwest	Oncology
GSTM1	18392488	2008	Morais et al	Not informed	Southwest	Controls
GSTM1	12433731	2002	Morari et al	White	Southwest	Oncology
GSTM1	12433731	2002	Morari et al	Not informed	Southwest	Oncology
GSTM1	12433731	2002	Morari et al	White	Southwest	Oncology
GSTM1	12433731	2002	Morari et al	Not informed	Southwest	Oncology
GSTM1	12433731	2002	Morari et al	Not informed	Southwest	Endocrinology
GSTM1	12433731	2002	Morari et al	Not informed	Southwest	Controls
GSTM1	16788846	2006	Morari et al	Not informed	Southwest	Oncology
GSTM1	16788846	2006	Morari et al	Not informed	Southwest	Controls
GSTM1	12682546	2003	Nascimento et al	White	Southwest	Oncology
GSTM1	12682546	2003	Nascimento et al	Black	Southwest	Oncology
GSTM1	12682546	2003	Nascimento et al	Not informed	Southwest	Controls
GSTM1	24637631	2014	Odebrecht Vargas Nunes et al	White	South	Psychiatry and Psychology
GSTM1	24637631	2014	Odebrecht Vargas Nunes et al	Black	South	Psychiatry and Psychology
GSTM1	24637631	2014	Odebrecht Vargas Nunes et al	Yellow	South	Psychiatry and Psychology
GSTM1	24637631	2014	Odebrecht Vargas Nunes et al	Mixed	South	Psychiatry and Psychology
GSTM1	24637631	2014	Odebrecht Vargas Nunes et al	White	South	Psychiatry and Psychology
GSTM1	24637631	2014	Odebrecht Vargas Nunes et al	Black	South	Psychiatry and Psychology
GSTM1	24637631	2014	Odebrecht Vargas Nunes et al	Yellow	South	Psychiatry and Psychology
GSTM1	24637631	2014	Odebrecht Vargas Nunes et al	Mixed	South	Psychiatry and Psychology
GSTM1	24637631	2014	Odebrecht Vargas Nunes et al	Not informed	South	Controls
GSTM1	20568049	2010	Oliveira et al	White	Southwest	Oncology
GSTM1	20568049	2010	Oliveira et al	Black	Southwest	Oncology
GSTM1	22960333	2012	Oliveira et al	White	Southwest	Oncology
GSTM1	22960333	2012	Oliveira et al	Black	Southwest	Oncology
GSTM1	22960333	2012	Oliveira et al	White	Southwest	Controls
GSTM1	22960333	2012	Oliveira et al	Black	Southwest	Controls
GSTM1	19442564	2009	Olivieri et al	Diverse	Southwest	Oncology
GSTM1	19442564	2009	Olivieri et al	Not informed	Southwest	Controls
GSTM1	12624497	2003	Ortega et al	White	Southwest	Oncology
GSTM1	12624497	2003	Ortega et al	Black	Southwest	Oncology
GSTM1	12624497	2003	Ortega et al	Not informed	Southwest	Controls
GSTM1	17653713	2007	Ortega et al	White	Southwest	Oncology
GSTM1	17653713	2007	Ortega et al	Black	Southwest	Oncology
GSTM1	17653713	2007	Ortega et al	White	Southwest	Controls
GSTM1	17653713	2007	Ortega et al	Black	Southwest	Controls
GSTM1	18455004	2008	Pagliuso et al	Not informed	Southwest	Nephrology
GSTM1	18455004	2008	Pagliuso et al	Not informed	Southwest	Controls
GSTM1	20658008	2010	Palodetto et al	Not informed	Southwest	Otolaryngology
GSTM1	20658008	2010	Palodetto et al	Not informed	Southwest	Controls
GSTM1	23684483	2013	Palodetto et al	Not informed	Southwest	Oncology
GSTM1	24098457	2013	Pinheiro et al	Not informed	Center west	Endocrinology
GSTM1	24098457	2013	Pinheiro et al	Not informed	Center west	Controls
GSTM1	18298341	2008	Pinhel et al	Not informed	Southwest	Psychiatry and Psychology
GSTM1	18298341	2008	Pinhel et al	Not informed	Southwest	Controls
GSTM1	25150625	2015	Pombo-de-Oliveira MS et al	White	South	Oncology
GSTM1	25150625	2015	Pombo-de-Oliveira MS et al	White	South	Oncology
GSTM1	21086258	2010	Reis et al 2010	Not informed	Center west	Endocrinology
GSTM1	21086258	2010	Reis et al 2011	Not informed	Center west	Controls
GSTM1	21738397	2011	Rocha et al	White	Northeast	Ophthalmology
GSTM1	21738397	2011	Rocha et al	Not informed	Northeast	Ophthalmology
GSTM1	21738397	2011	Rocha et al	White	Northeast	Controls
GSTM1	21738397	2011	Rocha et al	Not informed	Northeast	Controls
GSTM1	20884258	2011	Rodrigues et al	White	South	Oncology
GSTM1	20884258	2011	Rodrigues et al	White	South	Controls
GSTM1	14963830	2002	Rossini et al	White	Southwest	Diverse
GSTM1	14963830	2002	Rossini et al	Mixed	Southwest	Diverse
GSTM1	14963830	2002	Rossini et al	Black	Southwest	Diverse
GSTM1	17916905	2007	Rossini et al	White	Southwest	Oncology
GSTM1	17916905	2007	Rossini et al	Diverse	Southwest	Oncology
GSTM1	17916905	2007	Rossini et al	White	Southwest	Controls
GSTM1	17916905	2007	Rossini et al	Diverse	Southwest	Controls
GSTM1	23661016	2013	Russo et al	Not informed	Southwest	Oncology
GSTM1	23661016	2013	Russo et al	Not informed	Southwest	Controls
GSTM1	25251951	2014	Sa et al	Not informed	Southwest	Oncology
GSTM1	25251951	2014	Sa et al	Not informed	Southwest	Controls
GSTM1	20577141	2010	Salinas-Souza etl al	White	Southwest	Oncology
GSTM1	20577141	2010	Salinas-Souza etl al	Mixed	Southwest	Oncology
GSTM1	20577141	2010	Salinas-Souza etl al	Black	Southwest	Oncology
GSTM1	20577141	2010	Salinas-Souza etl al	Yellow	Southwest	Oncology
GSTM1	20577141	2010	Salinas-Souza etl al	White	Southwest	Controls
GSTM1	20577141	2010	Salinas-Souza etl al	Mixed	Southwest	Controls
GSTM1	20577141	2010	Salinas-Souza etl al	Black	Southwest	Controls
GSTM1	20577141	2010	Salinas-Souza etl al	Yellow	Southwest	Controls
GSTM1	19114965	2009	Sampaio et al	White	Southwest	Oncology
GSTM1	19114965	2009	Sampaio et al	Not informed	Southwest	Oncology
GSTM1	19114965	2009	Sampaio et al	White	Southwest	Controls
GSTM1	19114965	2009	Sampaio et al	Not informed	Southwest	Controls
GSTM1	21489839	2011	Silva et al	Not informed	Southwest	Hematology
GSTM1	21489839	2011	Silva et al	Not informed	Southwest	Controls
GSTM1	23765968	2013	Silva et al	Not informed	Southwest	Psychiatry and Psychology
GSTM1	23765968	2013	Silva et al	Not informed	Southwest	Controls
GSTM1	25366778	2014	Silva et al	Not informed	Center west	Ophthalmology
GSTM1	25366778	2014	Silva et al	Not informed	Center west	Controls
GSTM1	22012226	2011	Teixeira et al	Not informed	Southwest	Infections and Infectious Diseases
GSTM1	18618215	2008	Torresan et al	White	South	Oncology
GSTM1	18618215	2008	Torresan et al	White	South	Controls
GSTM1	25445355	2015	Vargas Nunes et al	White	South	Controls
GSTM1	25445355	2015	Vargas Nunes et al	Diverse	South	Controls
GSTM1	25445355	2015	Vargas Nunes et al	Mixed	South	Controls
GSTM1	25445355	2015	Vargas Nunes et al	White	South	Psychiatry and Psychology
GSTM1	25445355	2015	Vargas Nunes et al	Diverse	South	Psychiatry and Psychology
GSTM1	25445355	2015	Vargas Nunes et al	Mixed	South	Psychiatry and Psychology
GSTM1	25445355	2015	Vargas Nunes et al	White	South	Psychiatry and Psychology
GSTM1	25445355	2015	Vargas Nunes et al	Diverse	South	Psychiatry and Psychology
GSTM1	25445355	2015	Vargas Nunes et al	Mixed	South	Psychiatry and Psychology
GSTM1	25445355	2015	Vargas Nunes et al	White	South	Psychiatry and Psychology
GSTM1	25445355	2015	Vargas Nunes et al	Diverse	South	Psychiatry and Psychology
GSTM1	25445355	2015	Vargas Nunes et al	Mixed	South	Psychiatry and Psychology
GSTM1	28837637	2017	Pinheiro et al.	Not informed	Center west	Psychiatry and Psychology
GSTM1	28837637	2017	Pinheiro et al.	Not informed	Center west	Controls
GSTM1	30883948	2019	Rinck-Junior et al	Diverse	Southwest	Oncology
GSTM1	30883948	2019	Rinck-Junior et al	Not informed	Southwest	Controls
GSTM1	30356976	2018	Rodrigues-Fleming et al	Not informed	Southwest	Oncology
GSTM1	30356976	2018	Rodrigues-Fleming et al	Not informed	Southwest	Controls
GSTM1	31697922	2019	Santos et al.	Not informed	Southwest	Infections and Infectious Diseases
GSTM1	28455582	2017	Campos et al	Not informed	South	Oncology
GSTM1	28455582	2017	Campos et al	Not informed	South	Controls
GSTM1	28686330	2017	Carron et al.	Not informed	Southwest	Oncology
GSTM1	29981844	2018	Lima et al.	Not informed	Center west	Endocrinology
GSTM1	29981844	2018	Lima et al.	Not informed	Center west	Controls
GSTM1	30526121	2018	Firigato et al.	Diverse	Southwest	Oncology
GSTM1	30526121	2018	Firigato et al.	Diverse	Southwest	Controls
GSTM1	27865386	2016	Heinrich et al	Native	Center west	Infections and Infectious Diseases
GSTM1	27865386	2016	Heinrich et al	Not informed	Center west	Infections and Infectious Diseases
GSTM1	28665417	2017	Lopes-Aguiar et al	Not informed	Southwest	Oncology
GSTM1	31249357	2019	Pincinato et al.	Not informed	Southwest	Oncology
GSTM1	27586145	2016	Carron et al.	Whites	Southwest	Oncology
GSTM1	26812289	2015	de Melo et al.	Not informed	South	Psychiatry and Psychology
GSTM1	26812289	2015	de Melo et al.	Not informed	South	Controls
GSTM1	26125818	2015	PR Júnior et al.	White	Center west	Ophthalmology
GSTM1	26125818	2015	PR Júnior et al.	Mixed	Center west	Ophthalmology
GSTM1	26125818	2015	PR Júnior et al.	Black	Center west	Ophthalmology
GSTM1	26125818	2015	PR Júnior et al.	White	Center west	Controls
GSTM1	26125818	2015	PR Júnior et al.	Mixed	Center west	Controls
GSTM1	26125818	2015	PR Júnior et al.	Black	Center west	Controls
GSTM1	26350109	2015	Kubiszeski et al.	Not informed	Center west	Obstetrics and Gynecology
GSTM1	26350109	2015	Kubiszeski et al.	Not informed	Center west	Controls
GSTM1	27323100	2016	Silva et al.	Not informed	Center west	Obstetrics and Gynecology
GSTM1	27323100	2016	Silva et al.	Not informed	Center west	Controls
GSTM1	29619129	2018	Yahouédéhou et al	Not informed	Northeast	Hematology
GSTM1	29619129	2018	Yahouédéhou et al	Not informed	Northeast	Hematology
GSTM1	16864595	2007	Abnet et al 2007	Not informed	South	Healthy volunteers
GSTM1	12365037	2002	Gaspar et al	Native Xavante	Center west	Healthy volunteers
GSTM1	12365037	2002	Gaspar et al	Native Guarani	Center west	Healthy volunteers
GSTM1	12365037	2002	Gaspar et al	Native Wai Wai	North	Healthy volunteers
GSTM1	12365037	2002	Gaspar et al	Native Zoró	Center west	Healthy volunteers
GSTM1	12365037	2002	Gaspar et al	Native Surui	Center west	Healthy volunteers
GSTM1	12365037	2002	Gaspar et al	Native Gavião	Center west	Healthy volunteers
GSTM1	21637445	2009	Maciel et al	Black	South	Healthy volunteers
GSTM1	21637445	2009	Maciel et al	White	South	Healthy volunteers
GSTM1	11198676	2000	Gattás et al	White	Southwest	Healthy volunteers
GSTM1	11198676	2000	Gattás et al	Mixed	Southwest	Healthy volunteers
GSTM1	9788723	1998	Arruda et al	Native Tupi Parakanã	North	Healthy volunteers
GSTM1	9788723	1998	Arruda et al	Black	Northeast	Healthy volunteers
GSTM1	9788723	1998	Arruda et al	White	Southwest	Healthy volunteers
GSTM1	23827356	2013	Barcelos et al	River dwellers	North	Healthy volunteers
GSTM1	25728017	2015	Barcelos et al	River dwellers	North	Healthy volunteers
GSTM1	22614024	2012	da Silva et al	Not informed	South	Healthy volunteers
GSTM1	24696865	2014	de Oliveira et al	River dwellers	North	Healthy volunteers
GSTM1	21637536	2011	Hiragi et al	Native Kayabi	Center west	Healthy volunteers
[truncated: 2,320 more rows]
